# Supplementary material for: Arctic sea ice, Eurasia teleconnection pattern and summer surface ozone pollution in North China
Source: Copernicus journal article supplement (doi:10.5194/acp-2018-1127), 2018-11-19
Supplement: Supplementary file [file acp-2018-1127-AC1-supplement.zip]

# Arctic sea ice, Eurasia teleconnection pattern and summer surface ozone pollution in North China: in terms of climate variability

Zhicong Yin<sup>12\*</sup>, Huijun Wang<sup>12</sup>, Yuyan Li<sup>1</sup>, Xiaohui Ma<sup>3</sup>, Xinyu Zhang<sup>1</sup>

<sup>1</sup>Key Laboratory of Meteorological Disaster, Ministry of Education / Joint International Research Laboratory of Climate and Environment Change (ILCEC) / Collaborative Innovation Center on Forecast and Evaluation of Meteorological Disasters (CIC-FEMD), Nanjing University of Information Science & Technology, Nanjing 210044, China

<sup>2</sup>Nansen-Zhu International Research Center, Institute of Atmospheric Physics, Chinese Academy of Sciences, Beijing, China

<sup>3</sup>Institute of Urban Meteorology, CMA / Environmental Meteorology Forecast Center of Beijing-Tianjin-Hebei

\*Corresponding author: Zhicong Yin (yinzhc@163.com)

**Abstract.** Summer surface O<sub>3</sub> pollution has rapidly intensified in China recently, damaging human and ecosystem health. In 2017, the summer mean maximum daily average 8 h concentration of ozone was greater than 150 µg/m<sup>3</sup> in North China. Basing on the close relationships between the O<sub>3</sub> concentration and the meteorological conditions, a daily surface O<sub>3</sub> weather index was constructed, which extends the study period to the historical period before 2007 and the projected future. Here, we show that in addition to anthropogenic emissions, the Eurasia teleconnection pattern (EUTPEU), a major globally significant atmospheric teleconnection pattern, influences surface O<sub>3</sub> pollution in North China on a time scale of climate. The local meteorological conditions associated with the EUTPEU -positive phase supported intense and efficient photochemical reactions to produce more surface O<sub>3</sub>. The associated southerlies over North China transported surrounding O<sub>3</sub> precursors to superpose local emissions. Increased solar radiation and high temperature during the positive EU phase dramatically enhanced O<sub>3</sub> photochemical reactions production. Furthermore, due to the close connection between the preceding May Arctic sea ice and summer EUTPEU pattern, approximately 60% of the interannual variability of summer surface O<sub>3</sub>-related weather conditions pollution was attributed to Arctic sea ice to the north of Eurasia. This finding will aids in understanding the interannual variation of O<sub>3</sub> pollution, specially the related meteorological conditions, the seasonal prediction of O<sub>3</sub> pollution.

**Keywords:** ozone pollution, photochemical reaction, Eurasia teleconnection pattern, climate change, Arctic sea ice

## 1 Introduction

Along with social and economic development, air pollution has been increasing serious in China (Chen, 2013; Watts et al., 2018). The major air pollution types in China are haze pollution in winter (Yin et al., 2015; Wang, 2018) and surface ozone (O<sub>3</sub>) pollution in summer (Ma et al., 2016; Tang et al., 2018). Due to drastic air pollution control in China since 2013, the low visibility it caused and its obvious unusual smell, haze pollution easily causes warning and are being controlled in recent years (The environmental statistics unit of stat-center in Peking University, 2018), appearing as sharp decreasing in fine particulate matter. However, surface O<sub>3</sub> pollution, which has always occurred on clear and sunny days (Wang et al., 2017), so

it is not visible to humans, has not improved (Li et al., 2018). The negative effects of surface O<sub>3</sub> pollution was not weaker than those of haze (Liu et al., 2018), but ~~the impacts of climate variability features and causes of on surface O<sub>3</sub> pollution in China, especially (Yang et al., 2014) the impacts of climate variability, have not been sufficiently studied. Europe has benefitted from its rigorous air protection act and maintained good air quality, but the surface ozone levels still showed significant increases during 1995–2012 (Yan et al., 2017). In the major urban areas in China, the surface O<sub>3</sub> concentrations have exceeded the ambient air quality standard by 100–200% (Wang et al., 2017), especially in the Yangtze River Delta (Tong et al., 2017) and Beijing-Tianjin-Hebei region in North China (Wang et al., 2006; Shi et al., 2015). In the major urban agglomerations in China, such as Beijing-Tianjin-Hebei, Yangtze River delta and the Pearl River delta, the surface O<sub>3</sub> concentrations exceeded the ambient air quality standard of China (i.e., 100 µg/m<sup>3</sup>) by 100–200 % (Wang et al., 2017). In the Yangtze River delta, the inter-annual variations of NO and O<sub>3</sub> levels generally presented decreasing and increasing trends respectively, from 2012 to 2015 at both urban and suburban sites (Tong et al., 2017). Furthermore, the concentration of O<sub>3</sub> and its precursors in Beijing-Tianjin-Hebei was significantly larger than that in other regions of China (Wang et al., 2006; Shi et al., 2015). Revealed by the datasets from Shangdianzi Station, the long-term trend of O<sub>3</sub> concentrations in North China indicated that the O<sub>3</sub> pollution has undergone a significant increase in the period of 2005–2015, with an average rate of 1.13 ± 0.01 ppb year<sup>-1</sup> (Ma et al., 2016).~~

Surface O<sub>3</sub> is a secondary pollutant. The precursors of O<sub>3</sub> (e.g. NO<sub>x</sub> and VOC) photochemically react to generate O<sub>3</sub> under suitable weather conditions, i.e., hot-day and sunny environments (An et al., 2009). ~~Sedimentation~~Surface deposition, dynamic transport and ~~attenuation-dispersion~~ of O<sub>3</sub> are also closely related to atmospheric circulations. ~~For example, The North Atlantic Oscillation intercontinentally affects surface O<sub>3</sub> concentrations over Europe (Christoudias et al., 2012; Pausata et al., 2012)the prevailing positive phase of the North Atlantic Oscillation contributed to the increasing ozone concentration in western and northern Europe, through the anomalous atmospheric circulations to influence regional photochemical processes (Christoudias et al., 2012; Pausata et al., 2012).~~The summer surface O<sub>3</sub> variability in North America is significantly modulated by the position of the jet stream (Barnes and Fiore, 2013; Lin et al., 20152014). Barnes and Fiore (2013) pointed out jet position may dynamically modulate surface ozone variability in eastern North America and other northern mid-latitude regions. A strong positive correlation between the East Asian summer monsoon and summer mean ozone existed ~~during 1986–2006, based on numerical model results (Yang et al., 2014). The model simulation by Yang et al. (2014) illustrated that the changes in meteorological parameters, associated with East Asian summer monsoon, lead to 2–5% interannual variations of surface O<sub>3</sub> concentrations over central eastern China. Focusing on the dataset in 2014, Aa~~

significantly strong west Pacific subtropical high resulted in higher relative humidity, more clouds, more rainfall, less ultraviolet radiation and lower air temperatures, which were ~~unfavorable~~unfavourable for the formation of O<sub>3</sub> (Zhao and Wang, 2017). ~~The photochemical reaction was the main local sources of O<sub>3</sub>. The hot and dry environments and the violent solar radiation could accelerate the chemical conversion from the precursor to O<sub>3</sub> (An et al., 2009; Tong et al., 2017). In 2013, a~~

severe heat wave-~~, with highest temperature 41.1 °C,~~ contributed to the high O<sub>3</sub> concentration in the Yangtze River Delta (Pu et al., 2017). The frequency of large-scale, extreme heat events is closely related to atmospheric patterns, such as the Eurasia teleconnection pattern (~~EUTPEU~~; Pu et al., 2017; Li and Sun, 2018) and aerosol effective radiative forcing (Liu and Liao, 2017). The winds from a polluted area also transport O<sub>3</sub> and its precursors downwind (Doherty et al., 2013). Due to the close relationship between surface O<sub>3</sub> and meteorological conditions, the impacts of climate change on O<sub>3</sub> have been projected by various numerical models (Doherty et al., 2013; ~~Nolte et al., 2008~~; Melkonyan and Wagner, 2013; Zhu and Liao, 2016; Gaudel et al., 2018). Over eastern China, the surface ozone concentration and possibility of severe ozone pollution may both increase in the future (Wang et al., 2013).

However, previous studies mainly focused on observational analyses of several synoptic processes (e.g., Zhao and Wang, 2017), rather than long-term climate diagnostics, because of the lack of long-term surface O<sub>3</sub> observations. The goal of this study is to examine the large-scale atmospheric circulations associated with the interannual variation of summer surface O<sub>3</sub> pollution in North China based on long-term meteorological observations. The role of May Arctic sea ice, as a preceding and effective driver, ~~were-was~~ also ~~analyzed~~analysed. The outcomes of our research, in terms of climate variability, may provide a basis for understanding the interannual variation of O<sub>3</sub> pollution, specially the related meteorological conditions, ~~and its seasonal to interannual prediction~~.

## 2 Data and Method

~~The observation duration of the surface O<sub>3</sub> concentration was much shorter than the meteorological measurements and could not support the climate analysis.~~ The hourly O<sub>3</sub> concentration data from 2014 to 2017 in China were provided by the Ministry of Environmental Protection of China. As one of the three regional background air-monitoring stations in China, ~~the~~ the hourly O<sub>3</sub> concentration data at the Shangdianzi station (SDZ: located at 40°39'N, 117°07'E and 293.3 m high) was continuously observed from 2006 to 2017 ~~at the Shangdianzi station (SDZ: located at 40°39'N, 117°07'E and 293.3 m high), one of the three regional background air-monitoring stations in China, and~~ were ~~collected and~~ controlled by the National Meteorological Information Center, China Meteorological Administration. According to the Technical Regulation on Ambient Air Quality Index of China (the Ministry of Environmental Protection of China, 2012), the maximum daily average 8 h concentration of ozone (MDA8) was ~~calculated-used~~ to represent the daily O<sub>3</sub> conditions. The MDA8 was calculated as the maximum of the running 8 h mean O<sub>3</sub> concentrations during 24 hours in the day. The monthly sea ice concentrations (1°×1°) were downloaded from the Met Office Hadley Center (Rayner et al. 2003), which are widely used in sea ice-related analysis.

The 1°×1° ERA-Interim data used here included the geopotential height (Z), zonal and meridional wind, relative humidity, vertical velocity, air temperature at different pressure levels, boundary layer height (BLH), surface air temperature (SAT) and wind, downward UV radiation, downward solar radiation, low and medium cloud cover and precipitation (Dee et al. 2011).

The daily mean and monthly mean ERA-Interim data were directly downloaded from the ERA-Interim website analyzed in this study. Furthermore, the daily mean and monthly reanalysis datasets supported by the National Oceanic and Atmospheric Administration (NOAA) were also employed and denoted as NOAA-NCEP/NCAR (National Center for Environmental Prediction and the National Center for Atmospheric Research) data. The 2.5°×2.5° geopotential height (Z), zonal and meridional wind, relative humidity, vertical velocity, air temperature at different pressure levels, SAT and wind, downward UV radiation, downward solar radiation, low and medium cloud cover were downloaded ~~from the National Center for Environmental Prediction and the National Center for Atmospheric Research~~ (Kalnay et al. 1996). The BLH of NCEP/NCAR dataset was only available from 1979 to 2014 in ~~the NOAA data was derived from the website of~~ the NOAA-CIRES 20th Century Reanalysis version 2c (Giese et al., 2016). The daily precipitation data was from the CPC global analysis of the daily precipitation dataset (Chen et al., 2008).

The EU pattern is a major teleconnection pattern in the Northern Hemisphere and appears in all seasons. Wang and Zhang (2015) used the method defined by Wallace and Gutzler (1981) to calculate the EU pattern index in winter and pointed out that the positive EU phase is associated with a cold-dry climate in East China, vice versa. Meanwhile, Wang and He (2015) regarded the summer EU pattern as the main reason for the severe summer drought in North China in 2014. Considering the seasonal change of the EU pattern's location, The calculation procedure for the Eurasia teleconnection pattern (EUTPEU) index here was consistent with that of Wang et al. and He (2015).

$$\text{EUTP index} = \frac{[-1 \times \overline{H500}_{(70-80^{\circ}N, 60-90^{\circ}E)} + 2 \times \overline{H500}_{(45-55^{\circ}N, 90-110^{\circ}E)} - 1 \times \overline{H500}_{(35-45^{\circ}N, 120-140^{\circ}E)}] / 4}{\text{EU index} = [-1 \times \overline{H500}_{(70-80^{\circ}N, 60-90^{\circ}E)} + 2 \times \overline{H500}_{(45-55^{\circ}N, 90-110^{\circ}E)} - 1 \times \overline{H500}_{(35-45^{\circ}N, 120-140^{\circ}E)}] / 4}$$

where H500 represents the geopotential height at 500 hPa, and overbars denote the area average.

To verify the connection between the Arctic sea ice and the O<sub>3</sub> pollution, the Community Atmosphere Model version 5.3 (CAM5, Meehl and Washington 2013) was employed to design numerical experiments. The spatial resolution employed was 0.9°×1.25°, with 30 vertical hybrid sigma-pressure levels. The climatological mean sea surface temperature and sea ice taken from the Hadley Center were used to force the control run.

### 3 Summer ozone pollution and associated weather conditions

Due to increased surface O<sub>3</sub> pollution in China, the number of O<sub>3</sub> measurement stations has dramatically increased since 2014 (Figure S1 a, c, e, g). During 2006–2014, O<sub>3</sub> concentrations were only observed in the most developed regions in China, ~~i.e., the Beijing-Tianjin-Hebei area, the Yangtze River Delta, and the Pearl River Delta~~. Since 2015, O<sub>3</sub> concentrations have been measured in most areas in eastern China. O<sub>3</sub> concentrations in the high-mid latitudes were higher than those in the lower latitudes, which appeared to be ~~separated bordered~~ by the Yangtze River. The O<sub>3</sub> concentrations in North China were ~~rather already~~ high in 2014; the summer mean ~~maximum daily average 8 h concentration of ozone (MDA8)~~ in North China was higher than 120 µg/m<sup>3</sup>. ~~The observations, with maximum MDA8 higher than 265 µg/m<sup>3</sup> (i.e., the threshold of the server surface O<sub>3</sub> pollution in China~~ Since) existed in the south of Hebei Province and the north of Shandong Province (Figure 1a). Since that time, the O<sub>3</sub> polluted region has expanded ~~approximately yearly~~. In 2017, the areas with summer mean MDA8 > 120 µg/m<sup>3</sup> were visibly enlarged. In North China, the summer mean MDA8 observations were larger than 150 µg/m<sup>3</sup>, and the maximum MDA8 was ~~almost higher than nearly~~ 265 µg/m<sup>3</sup> ~~(i.e., the threshold of severe surface O<sub>3</sub> pollution)~~. South of the Yangtze River, the O<sub>3</sub> concentrations were distinctly lower and decreased progressively towards the Pearl River Delta.

The time span of O<sub>3</sub> observations ~~(i.e., 2015–2017 for most of the sites)~~ limited the possibility of determining the role of climate variability in the interannual O<sub>3</sub> variations in North China. Thus, we examined the representativeness of the O<sub>3</sub> measurements at ~~SDZ, Shangdianzi station (SDZ; one of the three regional background air-monitoring stations in China, with observations from 2006–2017), with observations from 2006–2017~~. The correlation coefficients between SDZ MDA8 and the observed MDA8 at the other sites were calculated and are shown in Figure S1 (b, d, f, h). ~~Similar to the O<sub>3</sub> concentrations,~~ The ~~distribution of~~ correlation coefficients ~~is similar to the MDA8 on Figure 1 (a, c, e, g) were also oppositely distributed south and north of 30°N~~. The SDZ MDA8 significantly covaried with the MDA8 in ~~the north of China, especially in~~ North China ~~in summer~~. ~~Along with the increasing of the surface O<sub>3</sub> pollution, the covariation and the representativeness of SDZ MDA8 to the MDA8 in North China was strengthened. However, the correlation coefficients between SDZ MDA8 and MDA8 in the south of China were negative, indicating opposite variation (Zhao and Wang, 2017).~~ The variation of summer SDZ MDA8 is presented in Figure S21. The ~~diurnal-daily~~ difference in MDA8 was large, which contradicts the quasi-constant emission of ozone precursors. Therefore, ~~we speculated~~ the impacts of meteorological conditions were significant. According to the Technical Regulation on Ambient Air Quality Index in China (The Ministry of Environmental Protection of China, 2012), the thresholds of ~~moderate surface O<sub>3</sub> pollution (MOP) and non-surface O<sub>3</sub> polluted ion (NOP) level and moderate surface O<sub>3</sub> polluted (MOP) level~~ are ~~215 µg/m<sup>3</sup> and 100 µg/m<sup>3</sup> and 215 µg/m<sup>3</sup>~~, respectively. ~~The upper and lower quartile of SDZ MDA8 was 188 µg/m<sup>3</sup> and 114 µg/m<sup>3</sup>, indicating that more than 75% of summer days were not the NOP days even at the regional background air-monitoring station.~~ During the years 2007–2017, there were 126 NOP days and 155 MOP days ~~in summer at SDZ station~~. The maximum number of MOP days was 26 days in 2015, and the mean number of MOP days was

14 days (Figure Table S13). The interannual variation in MOP (NOP) days was significant at the 95% confidence level, without an obvious long-term trend.

150 Due to the significant covariation between the SDZ MDA8 to the MDA8 in North China, although The-the meteorological  
conditions were composited for the MOP and NOP days in SDZ (Figure 42), the results were also appropriate for those in  
North China. The local and surrounding weather conditions were significantly different. During calculating the correlation  
coefficients with the meteorological conditions, the averaging area for meteorological indexes were the regions with most  
significantly different elements in the composites of MOP and NOP events. The anomalous southerlies, higher ~~boundary~~  
155 ~~layer height~~ (BLH), less rainfall, warmer surface air temperature, and cooler temperature in the high troposphere favored  
surface O<sub>3</sub> pollution and *vice versa*. Anomalous southerlies from the Yangtze River transported O<sub>3</sub> precursors (that were  
~~discharged-emitted~~ in the economically developed Yangtze River Delta) and superposed them with the local high emissions in  
North China (Figure 4a2a). When the anomalous winds reversed, i.e., northerlies, the O<sub>3</sub> precursors in North China was  
dispersed, and the surface O<sub>3</sub> concentration was reduced (Figure 4b2b). The correlation coefficient between the SDZ O<sub>3</sub>  
160 concentration and the area-averaged meridional wind at 10 m (35–50°N50°N, 110–122.5°N5°E, denoted as V10mI) was 0.39,  
exceeding the 99% confidence level. The ~~moisture environment (i.e., high relative humidity) and~~ cloudy skies ~~and were~~  
~~essential conditions for precipitation, which~~ weakened the photochemical reaction by influencing exposure to ultraviolet rays.  
In addition, precipitation was also an important indicator of the wet removal efficiency (Figure 4f2f). In summer, a day without  
rain represents efficient solar radiation, in favor of the occurrence of surface O<sub>3</sub> pollution (Figure 4e2e). The correlation  
165 coefficient between the area-averaged precipitation (37.5–42.5°N, 112–127.5°NE, denoted as PI) and the SDZ O<sub>3</sub>  
concentration was –0.35 (above the 99% confidence level), indicating that ~~sufficient~~ precipitation was connected with more  
NOP days.

In contrast, ~~the high temperature near the surface~~ SAT enhanced ~~the~~ the photochemical reactions and resulted in ~~a~~ higher surface  
O<sub>3</sub> concentrations (Figure 4-2 g). ~~The sky without clouds not only provided strong solar radiation (i.e., warmer surface air~~  
170 ~~temperature) but also resulted in weak absorption of long wave radiation in the upper air (i.e., cooler temperature at 200 hPa).~~  
The correlation coefficient between the area-averaged difference in the temperature at the surface and 200 hPa (~~surface air~~  
~~temperature~~ SAT minus temperature at 200 hPa, 37.5–47.5°N, 110–122.5°NE, denoted as DTI) and the SDZ O<sub>3</sub> concentration  
was 0.49. Furthermore, due to the strengthening of solar radiation, the near-surface turbulence was enhanced, and the boundary  
layer was lifted (Figure 4e2c). The ~~entrainment downwash~~ of atmospheric ozone from the upper air into the boundary layer  
175 enlarged the surface O<sub>3</sub> concentration (An et al., 2009). The correlation coefficient between the SDZ O<sub>3</sub> concentration and the  
area-averaged BLH (37.5–47.5°N, 112.5–120°NE, denoted as BI) was 0.40. Therefore, the anomalous southerlies, high surface  
temperature, above average BLH, and sunny skies were favorable environments for severe surface O<sub>3</sub> pollution. To confirm  
the robustness of the link between meteorological conditions and the MOP and NOP days over North China, the above



composite analysis was repeated with ~~NOAA-NCEP/NCAR~~ reanalysis data, and identical results were obtained (Figures S24, S53).

To assess the interannual variation of surface O<sub>3</sub> pollution and its relationship with climate variability (Cai et al., 2017), we tried to fit an O<sub>3</sub> weather index (OWI) based on long-term meteorological observations. Here, we defined the OWI as OWI=normalized V10mI+normalized BI-normalized PI+normalized DTI. For comparison, the multiple regression equation was built between the MDA8 and associated weather indices (Figure S63). Our analysis indicated that the observed MDA8 was well fit by the multiple regression equation (Figure S63). The correlation coefficient was 0.61 between the fit and daily measured MDA8 during 2007–2017 (i.e., 92 days × 11 years). ~~In contrast, t~~The correlation coefficient between the observed MDA8 and daily OWI was also 0.61 for the 11 year period. Thus, the OWI was easily constructed by accumulating the normalized weather index and was selected to represent the variation in surface O<sub>3</sub> pollution. A total of 90.3% of the MOP events were in the range of OWI > 0, and correspondingly, 90.5% of the NOP events were linked with OWI < 0 (Figure 24). The correlation coefficients between the OWI and observed MDA8 at the other sites were calculated (Figure S75). The significantly positive correlations were distributed in North China (Figure 5 b-d). Thus, it is reasonable to ~~analyze~~analyze the variation in surface O<sub>3</sub> pollution in North China using the OWI, which also extends the study period to the historical period before 2007 and the projected future.

#### 4 Impacts of ~~EUTPEU~~ pattern on the interannual variation of surface ozone

After ~~the assimilation of satellite data, possible in~~ 1979, the quality of the reanalysis data was improved ~~to support studies of climate variability and change~~. Here, the daily OWI was calculated with both ERA-Interim and ~~NCEP/NCAR~~NOAA reanalysis data ~~from 1979~~. ~~According to the above analysis, the daily OWI could largely represent the variation in MDA8 in North China. T~~and the monthly ~~mean~~ OWI was computed ~~as the monthly mean of the daily OWI~~. During 2007–2017, the constructed JJA (~~June-July-August~~) mean OWI varied similarly with the observed MDA8 and captured the extremes (Figure 63). ~~Although the range of the SDZ MDA8 was 2006–2017. In the above composite analysis and OWI construction processes, only the data from 2007 to 2017 were used in the above OWI construction processes. the range of the data used was 2007–2017; thus~~Thus, the datasets in 2006 were independently ~~samples (i.e., test set), and could verify the performance of the OWI~~ed samples. The JJA mean OWI in 2006 successfully reflected the variation in observed MDA8; even the MDA8 in 2006 was ~~a staged~~the minimum, ~~confirming the robustness of the OWI~~. Derived from two different reanalysis datasets, the OWI-ERA and OWI-~~NCEP~~NOAA varied consistently. ~~The above independent verifications proved that the performance of the summer OWI did not depend on the kinds of reanalysis data, confirming the robustness of the monthly OWI~~. In the following study, the monthly OWI from ERA-interim data and associated physical mechanisms were ~~analyzed~~analysed. Before the mid-1990s, the OWI was below zero, with a slightly decreasing trend and insignificant interannual variation. Since then, the OWI

has ~~significantly~~ increased; furthermore, the intensity of interannual variation has strengthened. The emissions of O<sub>3</sub> precursors increased persistently and linearly due to the steady economic development in China (Wang 2017). ~~We speculated that the~~ strong interannual variation in the OWI, representing the impacts of meteorological conditions on O<sub>3</sub> concentrations, ~~contributed to the interannual fluctuations of the~~ surface O<sub>3</sub> pollution ~~was significantly related to climate variability~~. Thus, the impacts of the large-scale atmospheric circulations on the summer O<sub>3</sub> pollution, specially the related OWI, ~~–~~ were analyzed.

The atmospheric circulation associated with summer mean OWI, indicated by the correlation coefficients, are displayed in Figure 74–5. In the mid-upper troposphere, cyclonic and anticyclonic anomalies were alternately distributed over the north-central Siberian Plateau (–), North China and Mongolia (+), and the Yellow Sea and Japan Sea (–) (Figure 74a). These three atmospheric centers, propagated from the polar region to the mid-latitudes, appeared to be the positive phase of EUTPEU pattern. This Rossby wave-like train, i.e., the EUTPEU pattern, could also be recognized in the surface air temperature. The correlation coefficient between the EUTPEU pattern index and OWI was 0.44 (after detrending and above the 99% confidence level), indicating that the strengthening of the EUTPEU –positive phase contributed to the severe surface O<sub>3</sub> pollution in North China. ~~–~~ More precisely, the positive phase of EUTPEU pattern could modulate the local meteorological conditions to enhance the photochemical reactions. The EUTPEU pattern is considered to be the main reason for the variability of the severe drought in North China, i.e., resulting in hot and dry climate extremes (Wang and He, 2015). To a certain extent, the severe drought environment promoted the formation of surface ozone. After 2007, the EUTPEU –index and the observational SDZ MDA8 synchronously changed (Figure S8). More than 80% of the SDZ MDA8 anomalies showed the same mathematical sign as the anomalous EUTPEU pattern index. Furthermore, the intensified EUTPEU pattern anomalies (i.e., the  $|\text{EUTPEU pattern index}| > 0.8 \times \text{its standard deviation}$ ) always induced homodromous surface ozone pollution.

Under barotropic anticyclonic circulation over North China, i.e., one of the active centers of the positive EUTPEU pattern, the significant descending air flows indicated efficient adiabatic heating (resulting in high temperatures near the surface) and dry air (i.e., less cloud cover) below 300 hPa. Furthermore, over North China, the air temperature (relative humidity) anomalies were negative (positive) at 200 hPa but positive (negative) below 300 hPa (Figure 74c). The barotropic anticyclonic circulation associated with surface ozone pollution (Figure 74b) was similar to the positive EUTPEU pattern (Figure 74c) and led to sunny days, i.e., hot temperatures (Figure 74a), strong downwards solar radiation and UV radiation (Figure 95c–d), less low and medium cloud cover (Figure 95d), and dry conditions (Figure 95b–c). Without the cover of low and medium clouds, the short wave solar radiation, especially the UV radiation, penetrated straight to the land surface. The photochemical reaction of the O<sub>3</sub> precursor was enhanced, generating more O<sub>3</sub> near the surface. The dry atmosphere near the surface, i.e., less precipitation and lower relative humidity, accelerated the photochemical reaction but restricted the wet clearing of the stocked O<sub>3</sub> in the atmosphere. A higher BLH (Figure 95b), resulting from the strengthening of solar radiation, facilitated the downward transportation of O<sub>3</sub> from aloft. Near the surface, the western part of these anticyclonic anomalies manifested as significant



southerlies (Figure 95a), which transported the O<sub>3</sub> precursors from the economically developed Yangtze River Delta. The extraneous O<sub>3</sub> precursor, superposed with local emissions, supported a harsh and efficient photochemical reaction of O<sub>3</sub>. ~~To confirm the robustness of the atmospheric circulation and associated physical mechanisms, the above analysis was repeated with the NOAA data, and identical results were obtained (Figure S9–S10).~~ To confirm the robustness of the atmospheric circulations and associated physical mechanisms, the above analysis was repeated by the NCEP/NCAR data and identical results were obtained (Figure S54–S65). The large-scale EU teleconnection, and anti-cyclonic circulations were clear. Local meteorological conditions, such as hot land surface (Figure S54), violet solar radiation (Figure S65c–d), clear sky (Figure S65d), less precipitation (Figure S65c) and lower relative humidity (Figure S65b) were also clearly recognized. Thus, the impacts of the atmospheric circulations were confirmed by both the ERA-Interim and NCEP/NCAR data, i.e., the analyses and conclusions were independent of data sets.

## 5 Roles of the Arctic sea ice

The positive **EUTPEU pattern** enhanced the local anticyclonic circulation over North China and facilitated the **photochemical** processes leading to the formation of surface ozone. The **EUTPEU pattern** originated from the Arctic region. **The preceding sea ice anomalies could stimulate atmospheric responses like EU pattern in summer (Wang and He, 2015);** ~~†~~ Thus, the role of Arctic sea ice on the OWI was also ~~considered explored~~ in this study. **The correlation between the sea ice and JJA OWI was monthly checked (Figure omitted), and we found** ~~†~~ the interannual variation of OWI was significantly correlated with May sea ice conditions to the north of Eurasia, especially near the Gakkel Ridge, the Canada Basin and the Beaufort Sea (Figure 610a). The ~~area~~-averaged (green boxes in Figure 610a) sea ice **area** in May was calculated as the SI index, whose linear correlation coefficient with JJA OWI was 0.67 (after detrending) from 1979 to 2017. During 2007–2017, 73% of the May SI anomalies may be followed by observational SDZ MDA8 anomalies with the same mathematical sign (Figure 610b). Furthermore, the linear and nonlinear relationships were both introduced using the generalized additive model (Figure S44–41), and the contribution of May sea ice to the interannual variability of OWI was approximately 60%.

These positive sea ice anomalies could induce **EUTPEU-like pattern-like** responses in the subsequent summer (Figure 610c). The excited atmospheric and thermal centers were located over the Central Siberian Plateau, North China and Mongolia, and the Yellow Sea. Similarly, the local meteorological responses, such as anomalous southerlies and less precipitation (Figure 610d), less cloud and strong solar radiation (Figure 610e) were also closely connected with the positive sea ice anomalies in May. Thus, the preceding May sea ice positively modulated the **EUTPEU pattern**, and then, this Rossby wave train transported the impacts from the polar region and strengthened the anti-cyclonic anomalies over North China. Finally, suitable meteorological conditions, including hot-dry air, anomalous southerlies and intense sunshine, were induced to intensify the photochemical production of surface ozone pollution. To confirm the roles of Arctic sea ice and associated physical

mechanisms, the above analysis was repeated with the ~~NOAA~~NCEP/NCAR data, and identical results were obtained (Figure S126).

The causality, i.e., the preceding May sea ice anomalies contributed to the subsequent JJA OWI in North China, was also confirmed by CAM5. During the control experiment (CTRL), the CAM5 model firstly integrated 20 years with climate mean initial and boundary conditions, and then, integrated 10 years with each 1st September of the last 5 years (i.e., five slightly different initial conditions). The JJA mean results of the last 6 years (i.e., 6 years  $\times$  5 groups = 30 ensembles) were employed as the output of the CTRL. On the basis of CTRL, the May sea ice concentration in the two boxes of Figure 10a was separately reduced by 10% (denoted as LowASI experiments), i.e., totally 30 sensitive runs. Similarly, the JJA mean results of 30 sensitive ensembles were employed as the output of the LowASI. The differences (LowASI minus CTRL) were the responses of atmospheric circulations and meteorological conditions to the declining May sea ice.

It was evident that an EU-like Rossby wave train was induced on the mid-troposphere (Figure 12a), which propagated from the Taymyr Peninsula (-), Northeast China (+), to east of China and the west Pacific (+). Under such large-scale atmospheric anomalies, the anomalies of relative humidity were significantly positive and resulted in denser low and cloud cover in North China (Figure 12d). Furthermore, the cover of cloud efficiently prevented the solar radiation from reaching the land surface, meanwhile, cooled the air in the boundary layer (Figure 12b). Without hot-dry air and violent sunshine, the photochemical reaction was significantly decelerated and the generation of surface O<sub>3</sub> was rather weak. On the other side, sufficient moisture and clouds caused more rainfall (Figure 12c). The wet deposition effect was also significantly enhanced. Thus, corresponding to less Arctic sea ice in May, the photochemical process to generate O<sub>3</sub> was weakened, but the wet deposition effect to decrease O<sub>3</sub> was enhanced. That is, the positive relationship and associated physical mechanisms were causally verified.

## 6 Conclusions and discussions

Recently, the summer surface O<sub>3</sub> concentrations and the number of O<sub>3</sub> observation stations have steadily increased in China. Spatially, the O<sub>3</sub> concentrations in North China were substantially higher than those in South China. To reveal the climatic driver and improve the potential of seasonal prediction of summer surface O<sub>3</sub> pollution in North China, a daily OWI (i.e., surface O<sub>3</sub> weather index) was constructed based on long-term meteorological observations. The robustness of this index (i.e., OWI) was verified by the ERA-Interim and NOAA reanalysis datasets and surface O<sub>3</sub> measurements. May Arctic sea ice was found to be a preceding and efficient climatic driver. In the historical period, variation in Arctic sea ice can explain approximately 60% of the interannual variability of the summer ~~surface-O<sub>3</sub>-pollution~~OWI in North China, which was closely associated with the surface O<sub>3</sub> pollution. Currently, the Arctic region has been warming approximately twice as much as the global average (Huang et al., 2017; Zhou, 2017), indicating accelerated change in the sea ice. Thus, understanding the role of Arctic sea ice may contribute to the seasonal ~~forecasting-look~~ of O<sub>3</sub> pollution.

300 The EUTPEU pattern acted as an atmospheric bridge to link May Arctic sea ice and the summer surface O<sub>3</sub> pollution in North China. The accumulated sea ice in May could induce or enhance the positive EUTPEU -phase. The anticyclonic circulation over North China, i.e., one of the active centers of the EUTPEU pattern, was connected with high surface temperature, strong downward solar radiation, less low and medium cloud cover, and drought over North China. Under such local meteorological conditions, the photochemical reaction to produce surface O<sub>3</sub> was accelerated. Generally, these anticyclonic anomalies over  
305 North China were barotropic and could persist for a long time; thus, the processes that produce surface O<sub>3</sub> were continuous to achieve a fairly high concentration. The connections revealed in this study were based on long-term meteorological measurements and ~~thus provide possibilities for the seasonal to interannual prediction of O<sub>3</sub> pollution. The seasonal outlook helps to determine whether extra stringent control measures on regional O<sub>3</sub> precursor emissions are needed to counteract the effect of climate variability~~ was casually verified by well-designed numerical experiments.

310 In order to extend the time range of this study, the OWI was constructed in North China. Although the feasibility of the construction approach was strictly examined, the OWI was still a substitution focusing on the impacts of the weather conditions. When discussing the impacts of atmospheric circulations, the linear trend was removed to weaken the signal of anthropogenic emissions. Thus, the results in this study concentrated on and emphasized the meteorological and climate factors. However, there is no doubt that the polluted emissions are the fundamental inducement of the surface O<sub>3</sub> pollution. The joint effects of  
315 the climate anomalies and the historical emissions should be lucubrated using the numerical models in the future. The processes how the weather conditions impacted the photochemical reaction were not deeply discussed here and have been analyzed in many previous studies by the atmospheric chemists. However, the reason why the cooler high troposphere contributed to the surface ozone pollution was still an open question and needed further attention. The EU pattern was a well-known continental Rossby wave train and could link the mid-high latitude climate with the change of the Arctic. Although the connection between  
320 the Arctic sea ice and the ozone pollution was revealed, the separate roles of the sea ice near the Gakkel Ridge, and the Canada Basin and Beaufort Sea should be intensively studied in the future.

#### Author contribution

Yin Z. C. and Wang H. J. designed the research. Yin Z. C., Li Y. Y. and Ma X. H. performed research. Yin Z. C. and Zhang  
325 X. Y. analysed data. Yin Z. C. prepared the manuscript with contributions from all co-authors.

The authors declare no conflict of interest.

## Acknowledgments

This research was supported by the National Key Research and Development Plan (2016YFA0600703), the National Natural Science Foundation of China (91744311 and 41705058), the CAS–PKU Partnership Program, and the Jiangsu innovation & entrepreneurship team.

## Reference

- An, J. L., Wang, Y. S., and Sun, Y. Assessment of ozone variations and meteorological effects in Beijing, *Ecology and Environmental Sciences*, 18(3), 944–951, 2009 (in Chinese).
- Barnes, E. A. and Fiore, A. M.: Surface ozone variability and the jet position: Implications for projecting future air quality, *Geophys. Res. Lett.*, 40, 2839–2844, 2013.
- Cai, W. J., Li, K., Liao, H., Wang, H. J., and Wu, L. X.: Weather Conditions Conducive to Beijing Severe Haze More Frequent under Climate Change, *Nature Climate Change*, <https://doi.org/10.1038/nclimate3249>, 2017.
- Chen, M., Xie, P., and CPC Precipitation Working Group.: CPC Unified Gauge-based Analysis of Global Daily Precipitation, Western Pacific Geophysics Meeting, Cairns, Australia, 29 July - 1 August, 2008.
- Chen, Y., Ebenstein, A., Greenstone, M., and Li, H.: Evidence on the impact of sustained exposure to air pollution on life expectancy from China's Huai River policy, *Atmospheric Chemistry and Physics*, 110, 12936–12941, 2013.
- Christoudias, T., Pozzer, A., and Lelieveld, J.: Influence of the North Atlantic Oscillation on air pollution transport, *Atmos. Chem. Phys.*, 12, 869–877, <https://doi.org/10.5194/acp-12-869-2012>, 2012.
- Dee, D. P., Uppala, S. M., Simmons, A. J., Berrisford, P., Poli, P., Kobayashi, S., Andrae, U., Balmaseda, M. A., Balsamo, G., Bauer, P., Bechtold, P., and Beljaars, A. C. M.: The ERA-Interim reanalysis: configuration and performance of the data assimilation system, *Q. J. Roy. Meteor. Soc.*, 137, 553–597, <https://doi.org/10.1002/qj.828>, 2011.
- Doherty, R. M., Wild, O., and Shindell, D. T., et al.: Impacts of climate change on surface ozone and intercontinental ozone pollution: A multi-model study, *Journal of Geophysical Research Atmospheres*, 118(9), 3744–3763, 2013.

- 355 [Gaudel, A, et al. Tropospheric Ozone Assessment Report: Present-day distribution and trends of tropospheric ozone relevant to climate and global atmospheric chemistry model evaluation. Elem Sci Anth 6:39. 2018.](#)
- Giese, B.S., Seidel, H.F., Compo, G.P., and Sardeshmukh, P.D.: An ensemble of ocean reanalyses for 1815–2013 with sparse observational input, *J. Geophys. Res. Oceans*, 121, 6891–6910, <https://doi.org/10.1002/2016JC012079>, 2016.
- Huang, X. T., Diao, Y. N., and Luo, D. H.: Amplified winter Arctic tropospheric warming and its link to atmospheric circulation changes, *Atmos. Oceanic Sci. Lett.*, 10(6), 435–445, <https://doi.org/10.1080/16742834.2017.1394159>, 2017.
- 360 Kalnay, E., Kanamitsu, M., Kistler, R., Collins, W., Deaven, D., Gandin, L., Iredell, M., Saha, S., White, G., Woollen, J., Zhu, Y., Leetmaa, A., Reynolds, R., Chelliah, M., Ebisuzaki, W., Higgins, W., Janowiak, J., Mo, K. C., Ropelewski, C., Wang, J., Jenne, R., and Joseph, D.: The NCEP/NCAR 40-year reanalysis project, *Bull. Am. Meteorol. Soc.*, 77, 437–471, [https://doi.org/10.1175/1520-0477\(1996\)077<0437: TNYRP>2.0. CO;2](https://doi.org/10.1175/1520-0477(1996)077<0437: TNYRP>2.0. CO;2), 1996.
- 365 [Li, K., Jacob, D. J., Liao, H., Shen, L., Zhang, Q., Bates, K. H.: Anthropogenic drivers of 2013–2017 trends in summer surface ozone in China, P NATL ACAD SCI USA., https://doi.org/10.1073/pnas.1812168116, 2018](#)
- Li, R. X., and Sun, J. Q.: Interdecadal variability of the large-scale extreme hot event frequency over the middle and lower reaches of the Yangtze River basin and its related atmospheric patterns, *Atmos. Oceanic Sci. Lett.*, 11(1), 63–70, <https://doi.org/10.1080/16742834.2017.1335580>, 2018.
- 370 [Liu, H., Liu, S., Xue, B. R., Lv, Z. F., Meng, Z. H., Yang, X. F., Xue, T., Yu, Q., and He, K. B.: Ground-level ozone pollution and its health impacts in China, Atmospheric Environment, 173, 223–230, 2018.](#)
- Liu, R. J., and Liao, H.: Assessment of aerosol effective radiative forcing and surface air temperature response over eastern China in CMIP5 models, *Atmos. Oceanic Sci. Lett.*, 10(3), 228–234, <https://doi.org/10.1080/16742834.2017.1301188>, 2017.
- 375 [Lin, M., Fiore, A. M., Horowitz, L. W., Langford, A. O., Oltmans, S. J., Tarasick, D., and Eieder, H.: Climate variability modulates western us ozone air quality in spring via deep stratospheric intrusions, Nature Communications, 6, 7105, 2015.](#)
- Lin, M. Y., Horowitz, L. W., Oltmans, S. J., Fiore, A. M., and Fan, S. M.: Tropospheric ozone trends at Mauna Loa Observatory tied to decadal climate variability, *Nature Geoscience*, 7, 136–143, 2014.
- Ma, Z., Xu, J., Quan, W., Zhang, Z., Lin, W., and Xu X.: Significant increase of surface ozone at a rural site, north of eastern China, *Atmospheric Chemistry and Physics*, 16(6), 3969–3977, 2016.
- 380 [Meehl, G. A., Washington, W. M., Arblaster, J. M., Hu, A., Teng, H., Kay, J. E., Gettelman, A., Lawrence, D. M., Sanderson, B. M., and Strand, W. G.: Climate change projections in CESM1 \(CAM5\) compared to CCSM4, Journal of Climate, 26, 6287–6308, 2013.](#)
- Melkonyan, A., and Wagner, P.: Ozone and its projection in regard to climate change, *Atmospheric Environment*, 67(2), 287–295, 2013.
- 385 [Nolte, C. G., Gillil, A. B., and Hogrefe, C., et al.: Linking global to regional models to assess future climate impacts on surface ozone levels in the United States, Journal of Geophysical Research: Atmospheres \(1984–2012\), 762–770, 2008.](#)

- Pausata, F. S. R., Pozzoli, L., Vignati, E., and Dentener, F. J.: North Atlantic Oscillation and tropospheric ozone variability in Europe: model analysis and measurements intercomparison, *Atmos. Chem. Phys.*, 12, 6357–6376, <https://doi.org/10.5194/acp-12-6357-2012>, 2012.
- 390 Pu, X., Wang, T. J., and Huang, X., et al.: Enhanced surface ozone during the heat wave of 2013 in Yangtze River Delta region, China, *Science of the Total Environment*, 603–604, 807–816, 2017.
- Rayner, N. A., D. E. Parker, E. B. Horton, C. K. Folland, L. V. Alexander, D. P. Rowell, E. C. Kent, and A. Kaplan.: Global analyses of sea surface temperature, sea ice, and night marine air temperature since the late nineteenth century. *J. Geophys. Res.*, 108, 4407, doi:10.1029/2002JD002670, 2003.
- 395 Shi, C., Wang, S., Liu, R., Zhou, R., Li, D., and Wang, W., et al.: A study of aerosol optical properties during ozone pollution episodes in 2013 over Shanghai, China. *Atmos. Res.*, 153, 235–249, 2015.
- Tang, B. Y., Xin, J. Y., Gao, W. K., Shao, P., Su, H. J., Wen, T. X., Song, T., Fan, G. Z., Wang, S. G., and Wang, Y. S.: Characteristics of complex air pollution in typical cities of North China, *Atmos. Oceanic Sci. Lett.*, 11(1), 29–36, <https://doi.org/10.1080/16742834.2018.1394158>, 2018.
- 400 The environmental statistics unit of stat-center in Perking University. Air quality Assessment Report (5): the assessments of the regional pollutions in “2+31” cities during 2013–2017, [http://songxichen.gsm.pku.edu.cn/index.php/Research/#tab\\_34](http://songxichen.gsm.pku.edu.cn/index.php/Research/#tab_34), 2018.
- The Ministry of Environmental Protection of China: Technical Regulation on Ambient Air Quality Index, 1pp, 2012.
- Tong, L., Zhang, H. L., Yu, J., He, M. M., Xu N. B., Zhang, J. J., Qian F. Z., Feng J. Y., and Xiao, H.: Characteristics of surface ozone and nitrogen oxides at urban, suburban and rural sites in Ningbo, China, *Atmospheric Research*, 187: 57–68, 2017.
- 405 [Wallace, J. M., Gutzler, D. S.: Teleconnections in the geopotential height field during the Northern Hemisphere winter. \*Mon Weather Rev\* 109\(2\):784–812, 1981](#)
- Wang, H. J.: On assessing haze attribution and control measures in China, *Atmospheric and Oceanic Science Letters*, 11:2, 120–122, DOI: 10.1080/16742834.2018.1409067, 2018.
- 410 Wang, H. J., and He, S. P.: The North China/Northeastern Asia Severe Summer Drought in 2014, *Journal of Climate*, 28(17), 6667–6681, 2015.
- [Wang, N., Zhang, Y.: Evolution of Eurasian teleconnection pattern and its relationship to climate anomalies in China. \*Climate Dynamics\*, 44\(3-4\):1017-1028. 2015](#)
- 415 Wang, T.: Ozone pollution in China: A review of concentrations, meteorological influences, chemical precursors, and effects, *Science of The Total Environment*, 575: 1582-1596, 2017.



Wang, T., Ding, A., Gao, J., and Wu, W. S.: Strong ozone production in urban plumes from Beijing, China, *Geophys. Res. Lett.*, 33(21), 320–337, 2006.

Wang, Y. X., Shen, L. L., Wu, S. L., Mlckley, L., He, J. W., and Hao, J. M.: Sensitivity of surface ozone over China to 2000–2050 global changes of climate and emissions, *Atmospheric Environment*, 75, 372–382, 2013.

Watts, N., Amann, M., Ayeb-Karlsson, S., et al.: The Lancet Countdown on health and climate change: From 25 years of inaction to a global transformation for public health, *Lancet*, 391, 10–16, 2018.

~~Yan, Y., Pozzer, A., Ojha, N., Lin, J., and Lelieveld, J.: Analysis of european ozone trends in the period 1995–2014, *Atmospheric Chemistry and Physics*, 18(8), 5589–5605, 2017.~~

Yang, Y., Liao, H., and Li, J.: Impacts of the East Asian summer monsoon on interannual variations of summertime surface-layer ozone concentrations over China, *Atmos. Chem. Phys.*, 14, 6867–6879, 2014.

Yin, Z. C., Wang, H. J., and Guo, W. L.: Climatic change features of fog and haze in winter over North China and Huang-Huai Area, *SCIENCE CHINA Earth Sciences*, 58(8), 1370–1376, 2015.

Zhao, Z. J., and Wang, Y. X.: Influence of the West Pacific subtropical high on surface ozone daily variability in summertime over eastern China, *Atmospheric Environment*, 180, 197–204, 2017.

Zhou, W.: Impact of Arctic amplification on East Asian winter climate. *Atmos. Oceanic Sci. Lett.*, 10(5), 385–388, doi: 10.1080/16742834.2017.1350093, 2017.

~~Zhu, J., Liao, H.: Future ozone air quality and radiative forcing over China owing to future changes in emissions under the Representative Concentration Pathways (RCPs). *J Geophys Res Atmos* 121:1978–2001, 2016.~~

## Table and Figures captions

**Figure 1.** The distribution of the JJA mean MDA8 (a, c, e, g) and the correlation coefficients (b, d, f, h) between the daily MDA8 and SDZ MDA8 from 2014 to 2017. The black cross in panels a, c, e, and g indicate that the maximum daily MDA8

was larger than  $265 \mu\text{g}/\text{m}^3$ . The black cross in panels b, d, f, and h indicates that the CC was above the 95% confidence level. The green triangle in panel (a) illustrates the location of the Shangdianzi site.

**Figure 42.** Composite of the meteorological conditions associated with different  $\text{O}_3$  events during 2007–2017. Results for MOP (a, c, e, g) and NOP (b, d, f, h) events included (a–b) surface wind (arrow) and v-wind (shading), (c–d) BLH, (e–f) precipitation, (g–h) SAT, and temperature at 200 hPa. The black dots denote the composite results passed the 95% confidence level. The boxes represent the area used to calculate OWI. These composites were calculated using the ERA-Interim datasets.

**Figure 3.** The variation in the daily (a) observational SDZ MDA8 (black), (b) fitting SDZ MDA8 (red), and (c) OWI (blue) from June to August during 2007–2017. The numbers are the correlation coefficients between the observational SDZ MDA8 and fitting SDZ MDA8 (red) and OWI (blue).

**Figure 42.** The OWI for MOP (red) and NOP (blue) events during 2007–2017.

**Figure 5.** The correlation coefficients between the daily MDA8 and OWI from 2014 to 2017. The black crosses indicate that the CC was above the 95% confidence level.

**Figure 36.** The variation in the JJA mean observed SDZ MDA8 (green) from 2006 to 2017, OWI calculated from ERA-interim datasets during 1979–2017 (blue) and OWI calculated from NOAA datasets (red) during 1979–2014.

**Figure 47.** The associated atmospheric circulation. (a) The correlation coefficients between the JJA mean OWI and surface air temperature (shading), wind (arrow) at 200 hPa and geopotential height at 500 hPa (contour) from 1979 to 2017. The black dots indicate that the CC with surface air temperature was above the 95% confidence level. The cross-section ( $110^\circ$ – $125^\circ\text{E}$  mean) correlation coefficients between JJA mean OWI (a), EUTPEU pattern index (b) and relative humidity (shading), temperature (contour), wind (arrow, vertical speed multiplied by 100) from 1979 to 2017. The black dots indicate that the CC with relative humidity exceeded the 95% confidence level (t test). The data used here are ERA-Interim datasets.

**Figure 8.** The variation in the JJA mean observational SDZ MDA8 (blue) and EU pattern index (red) from 2007 to 2017.

**Figure 59.** The associated meteorological conditions. (a) The correlation coefficients between the JJA mean OWI and v wind at 10 m (shading), surface wind (arrow), (b) relative humidity near the surface (shading), boundary layer height (contour), (c) precipitation (shading), downward UV radiation at the surface (contour), (d) downward solar radiation at the surface (shading), sum of low and medium cloud cover (contour) from 1979 to 2017. The black dots indicate that the CC with temperature was above the 95% confidence level. The contours plotted in panel (b–d) exceeded the 95% confidence level. The data used here are ERA-Interim datasets.

**Figure 610.** The role of the Arctic sea ice. (a) The correlation coefficients between the JJA mean OWI and May sea ice, (b) The variation of the May SI index (red bar, area-averaged sea ice of the green boxes in panel a), JJA mean EUTPEU pattern index (blue bar) and JJA mean observational SDZ MDA8 (black bar) from 2007 to 2017. (c) The correlation coefficients between the May SI index and surface air temperature (shading), geopotential height at 500 hPa (contour) from 1979 to 2017. The black dots indicate that the CC with surface air temperature was above the 95% confidence level. (d) The correlation coefficients between the May SI index and precipitation (shading), surface wind (arrow), (e) downward UV radiation at the surface (shading) and sum of low and medium cloud cover (contour) from 1979 to 2017. The black dots indicate that the shading CC with precipitation (d) and downward UV radiation (e) was above the 95% confidence level. The data used here are ERA-Interim datasets.

**Figure 11.** The variation in the observational OWI (black) and the fitted OWI by the generalized additive model (red) from 1979 to 201

490  
495  
500  
505  
510  
515  
520

**Figure 12.** Composite results of the LowASI experiments (LowASI minus Ctrl) by the CAM5 model: (a) geopotential height at 500 hPa, (b) precipitation, (c) net radiative flux at the top of the atmosphere (shading) and temperature at 925 hPa (contour), and (d) sum of low and medium cloud fraction (shading) and relative humidity at 925 hPa (contour). The black hatching denotes the differences with shading were above the 95% confidence level (**t-test**).

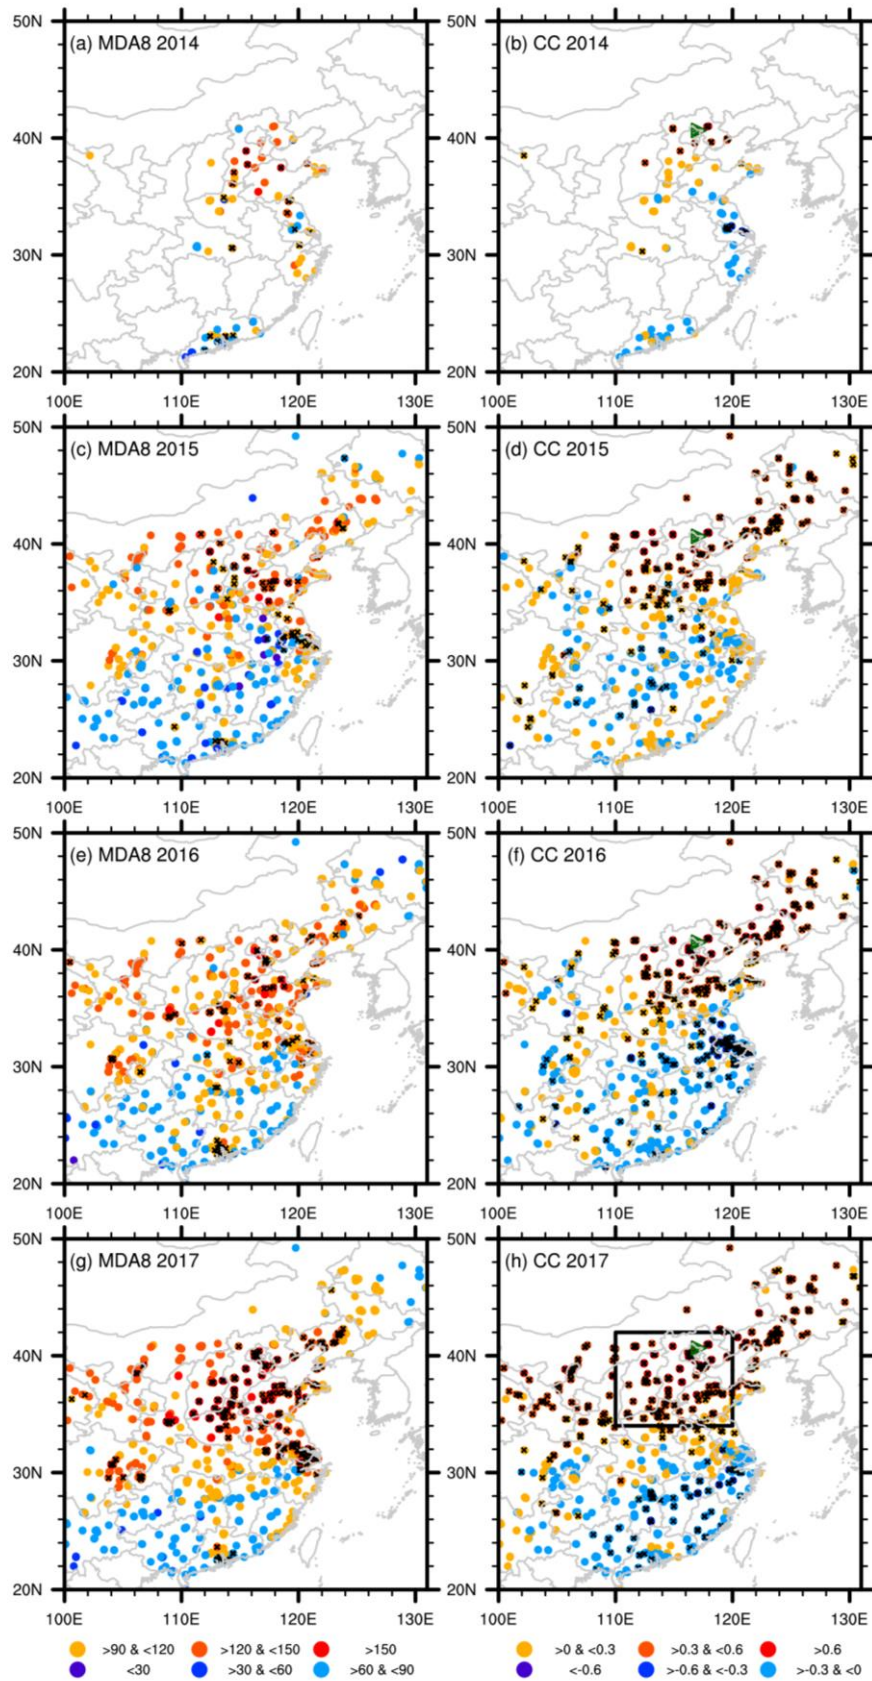

Figure 1. The distribution of the JJA mean MDA8 (a, c, e, g) and the correlation coefficients (b, d, f, h) between the daily MDA8 and SDZ MDA8 from 2014 to 2017. The black cross in panels a, c, e, and g indicate that the maximum daily MDA8 was larger than  $265 \mu\text{g}/\text{m}^3$ . The black cross in panels b, d, f, and h indicate that the CC was above the 95% confidence level. The green triangle in panels b, d, f, and h illustrate the location of the SDZ station. The black box in panel h is the range of

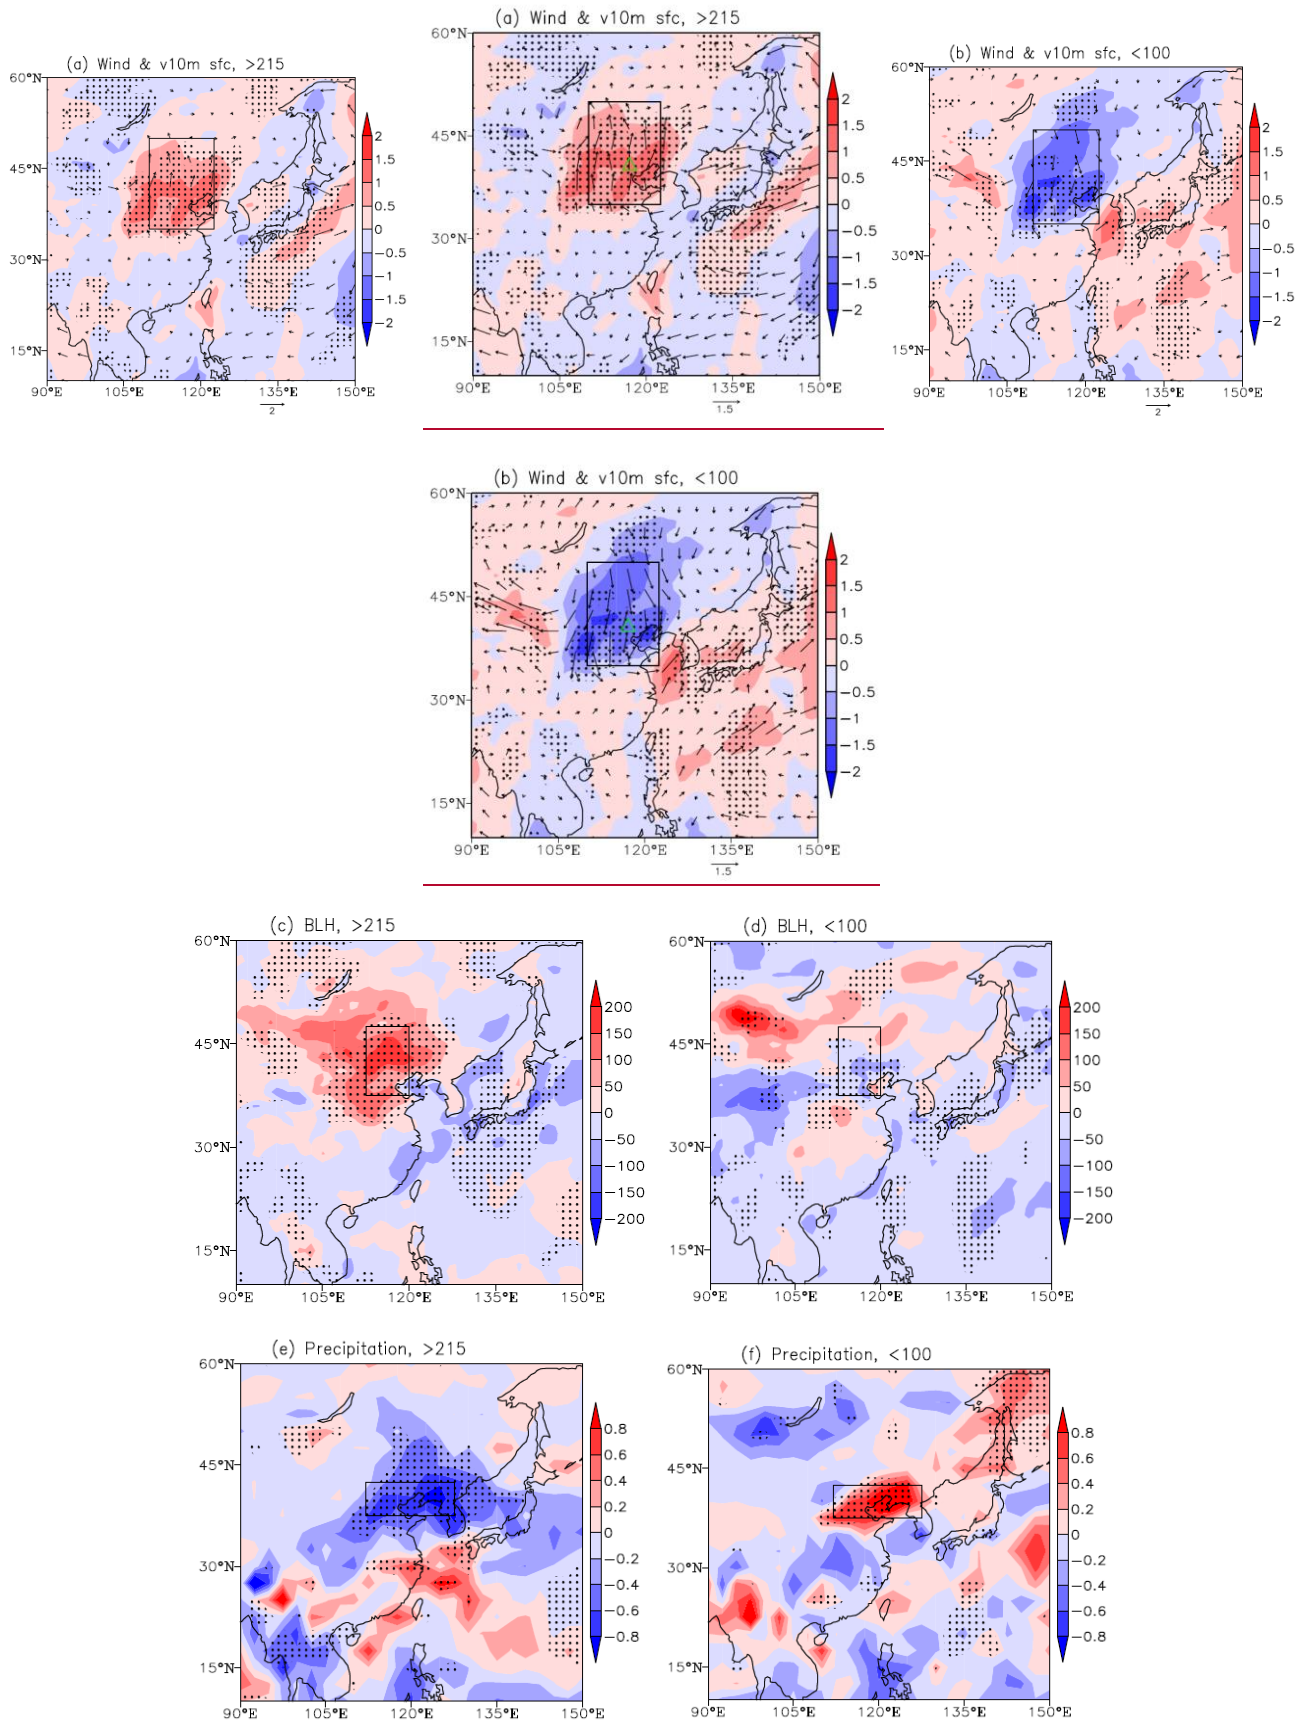



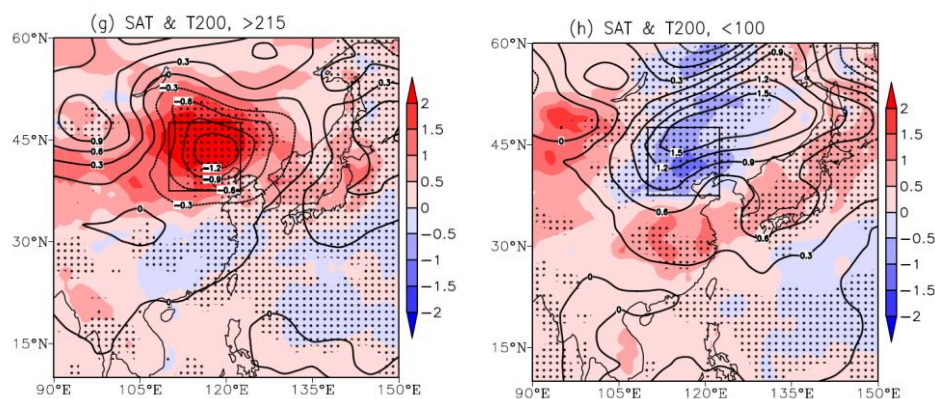

Figure 24. Composite of the meteorological conditions associated with different O<sub>3</sub> events during 2007–2017. Results for MOP (a, c, e, g) and NOP (b, d, f, h) events included (a–b) surface wind (arrow) and v-wind (shading), (c–d) BLH, (e–f) precipitation, (g–h) SAT (shading), and temperature at 200 hPa (contour). The black dots denote the composite results passed the 95% confidence level. The boxes represent the area used to calculate OWI. These composites were calculated using the ERA-Interim datasets. The green triangle in panel (a-b) illustrates the location of the Shangdianzi site.

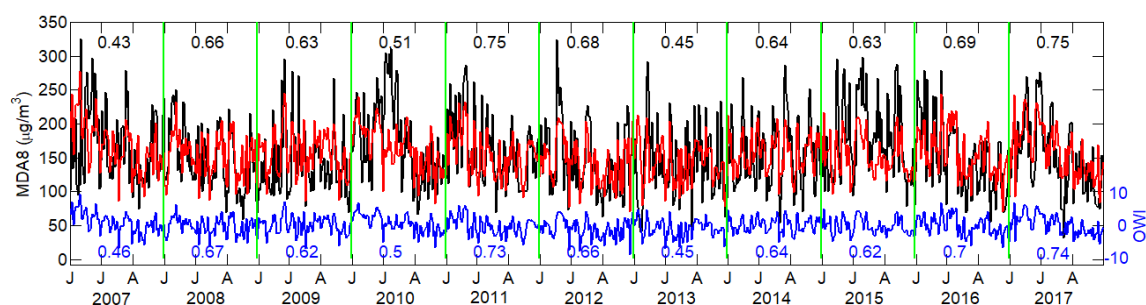

Figure 3. The variation in the daily (a) observational SDZ MDA8 (black), (b) fitting SDZ MDA8 (red), and (c) OWI (blue) from June to August during 2007–2017. The numbers are the correlation coefficients between the observational SDZ MDA8 and fitting SDZ MDA8 (red) and OWI (blue).



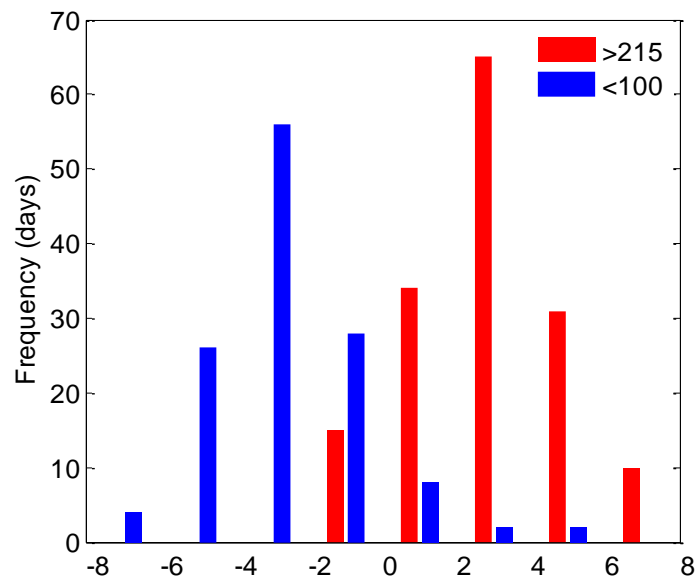

Figure-24. The OWI for MOP (red) and NOP (blue) events during 2007–2017.

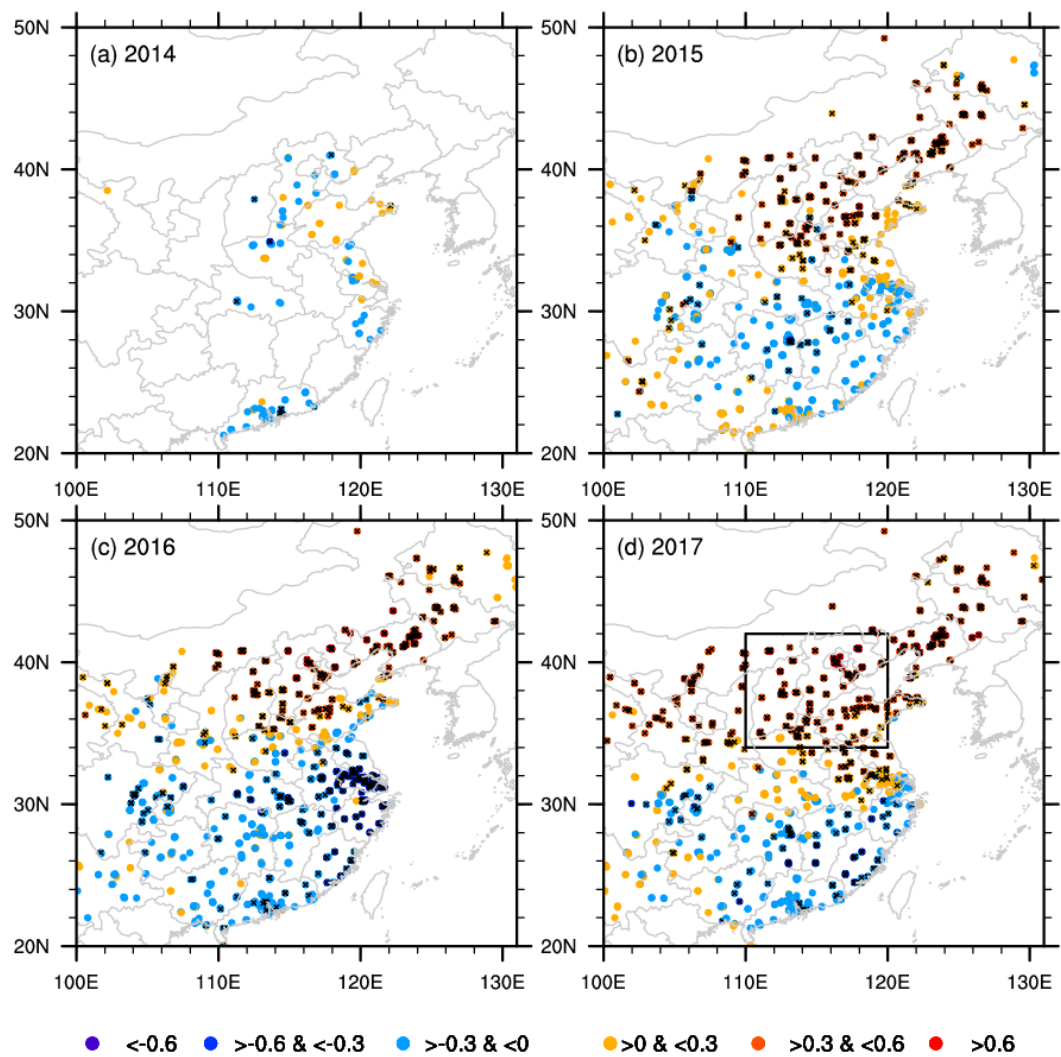

Figure 5. The correlation coefficients between the daily MDA8 and OWI from 2014 to 2017. The black crosses indicate that the CC was above the 95% confidence level. The black box in panel d is the range of North China.

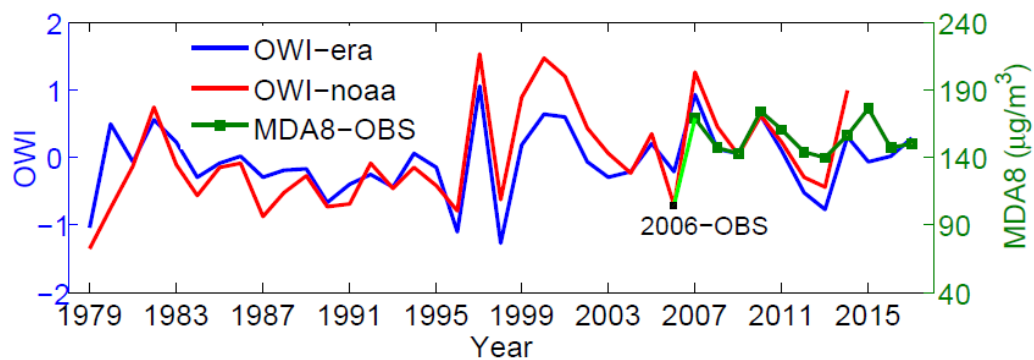

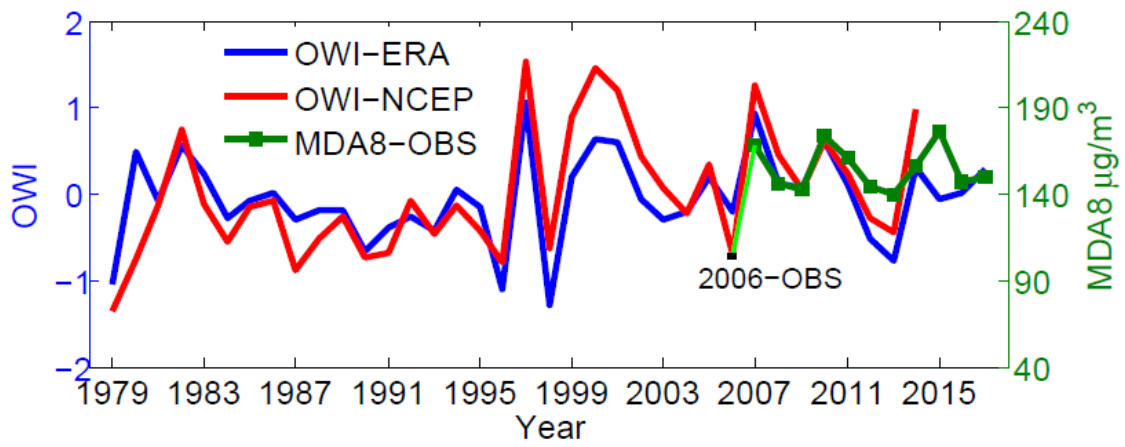

Figure 36. The variation in the JJA mean observed SDZ MDA8 (green) from 2006 to 2017, OWI calculated from ERA-interim datasets during 1979–2017 (blue) and OWI calculated from NOAA-NCEP/NCAR datasets (red) during 1979–2014.

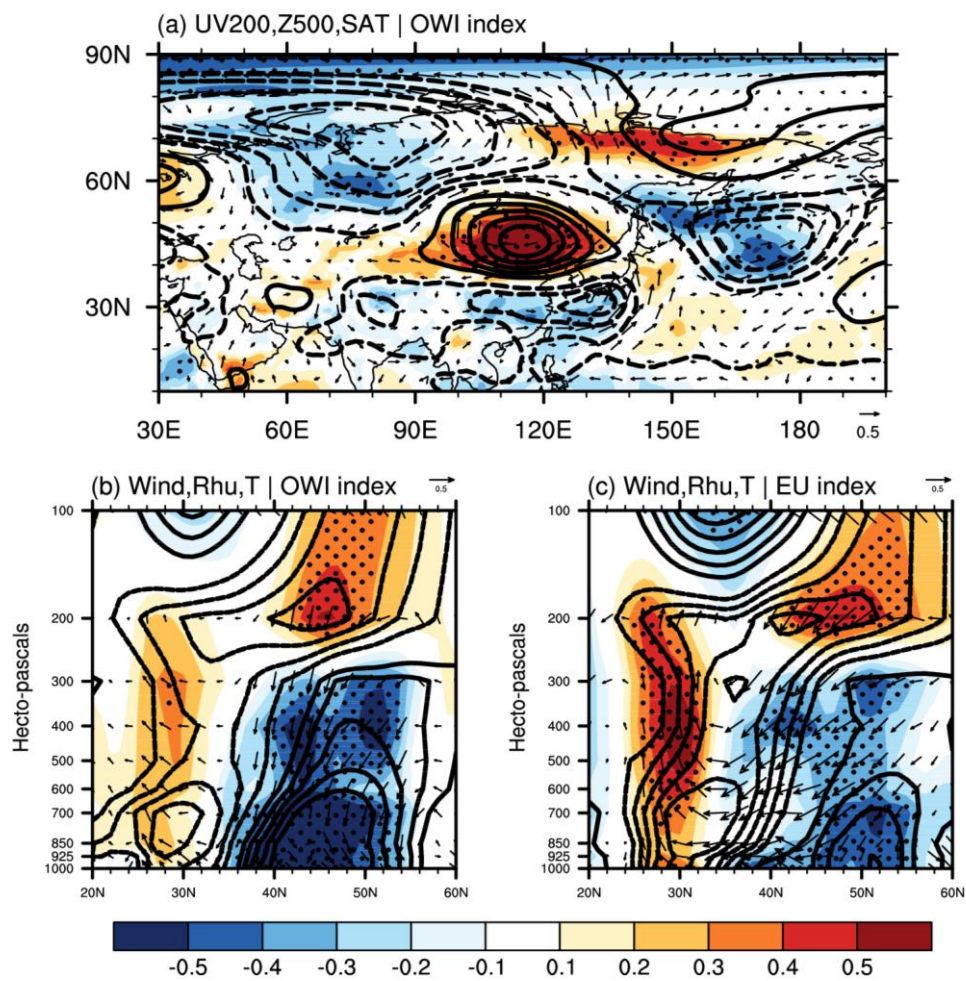

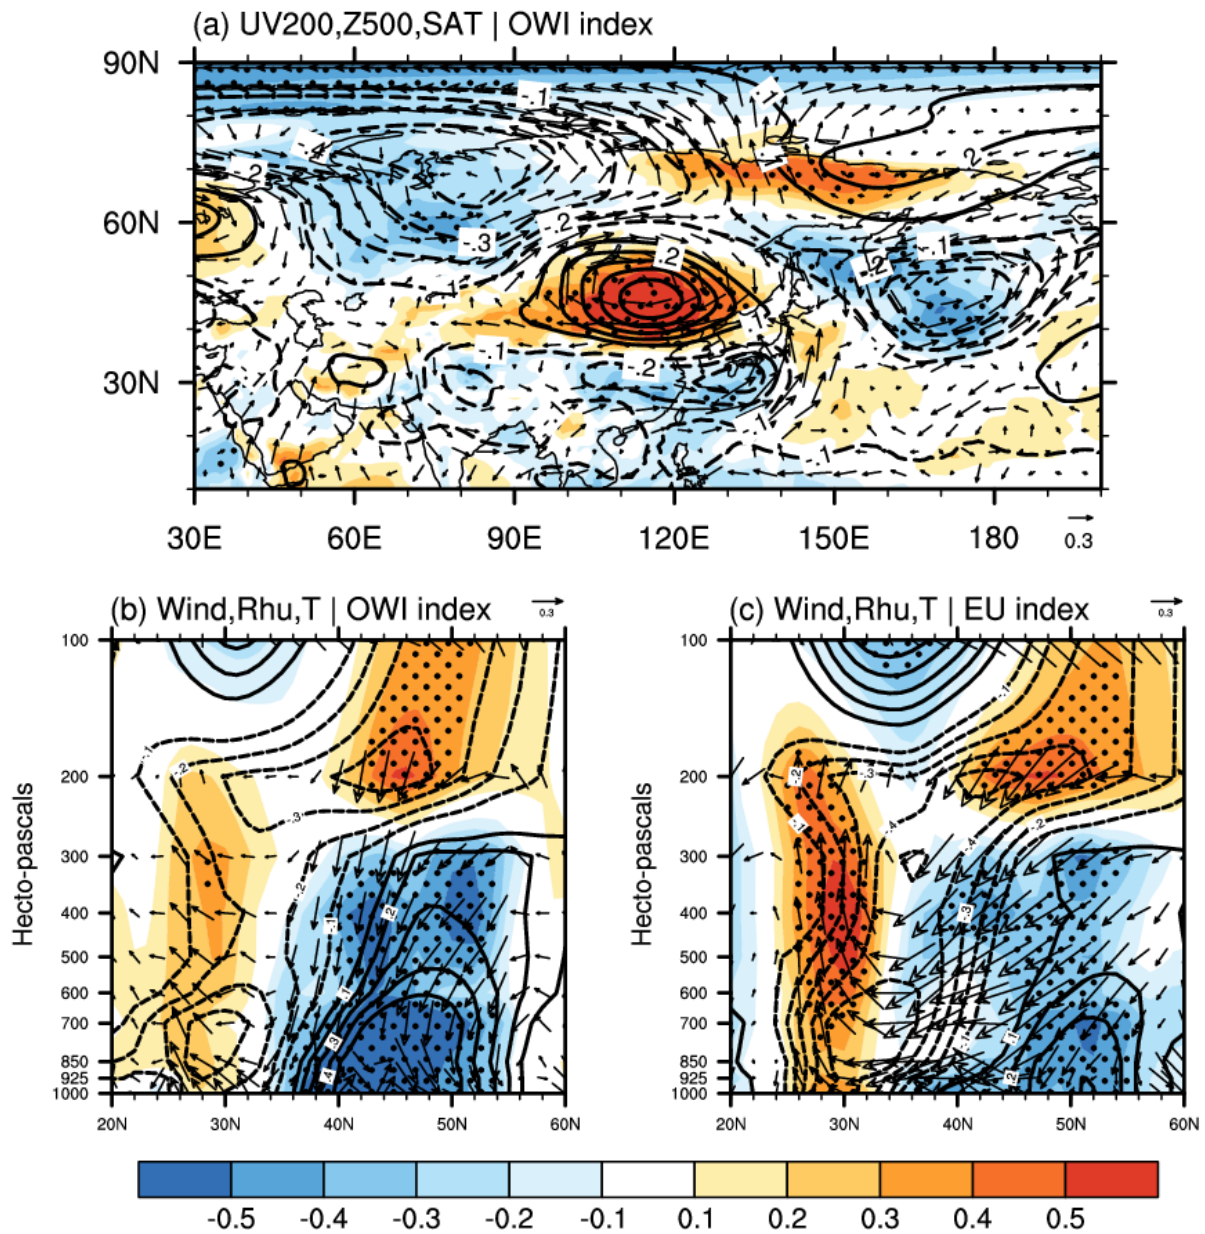

Figure 47. The associated atmospheric circulation. (a) The correlation coefficients between the JJA mean OWI and surface air temperature (shading), wind (arrow) at 200 hPa and geopotential height at 500 hPa (contour) from 1979 to 2017. The black dots indicate that the CC with surface air temperature was above the 95% confidence level. The cross-section (110°–125°E mean) correlation coefficients between JJA mean OWI (a), [EUTPEU pattern](#) index (b) and relative humidity (shading), temperature (contour), wind (arrow, vertical speed multiplied by 100) from 1979 to 2017. The black dots indicate that the CC with relative humidity exceeded the 95% confidence level (t test). The data used here are ERA-Interim datasets.



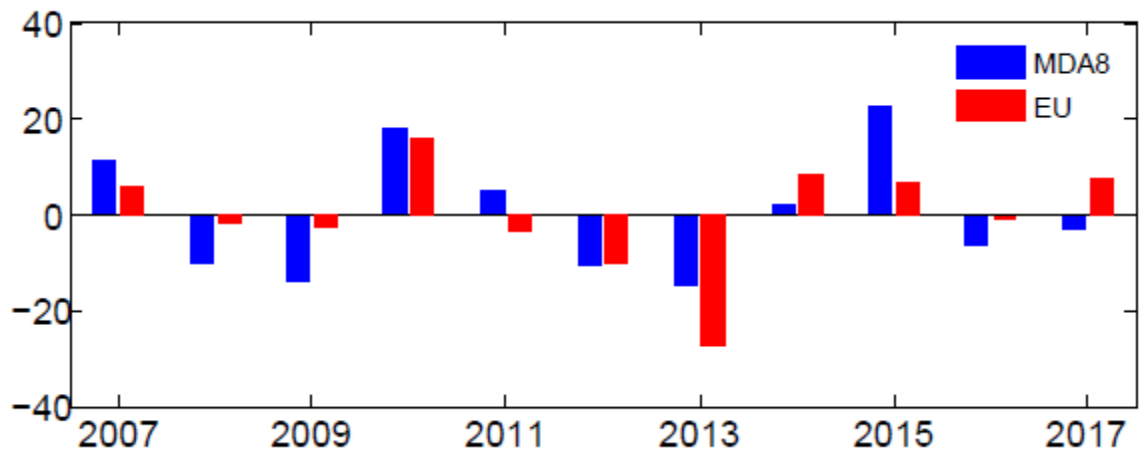

Figure 8. The variation in the JJA mean observational SDZ MDA8 (blue) and EU index (red) from 2007 to 2017.

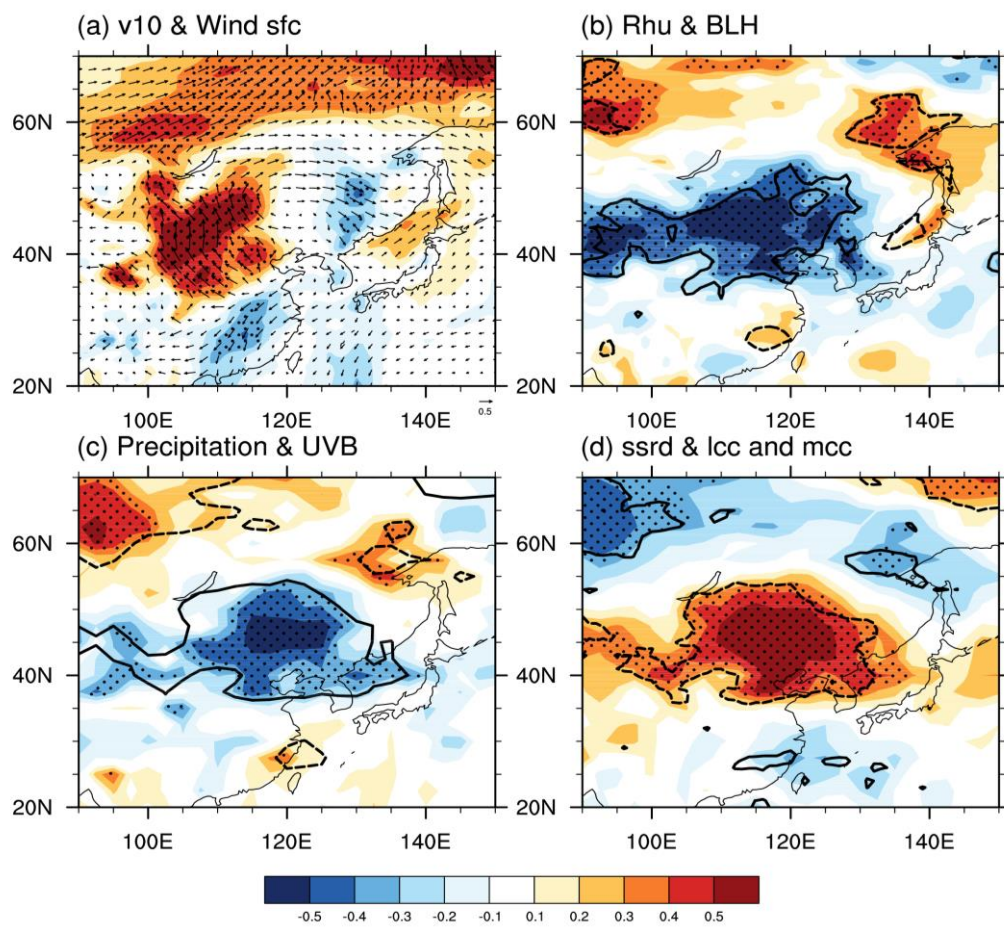

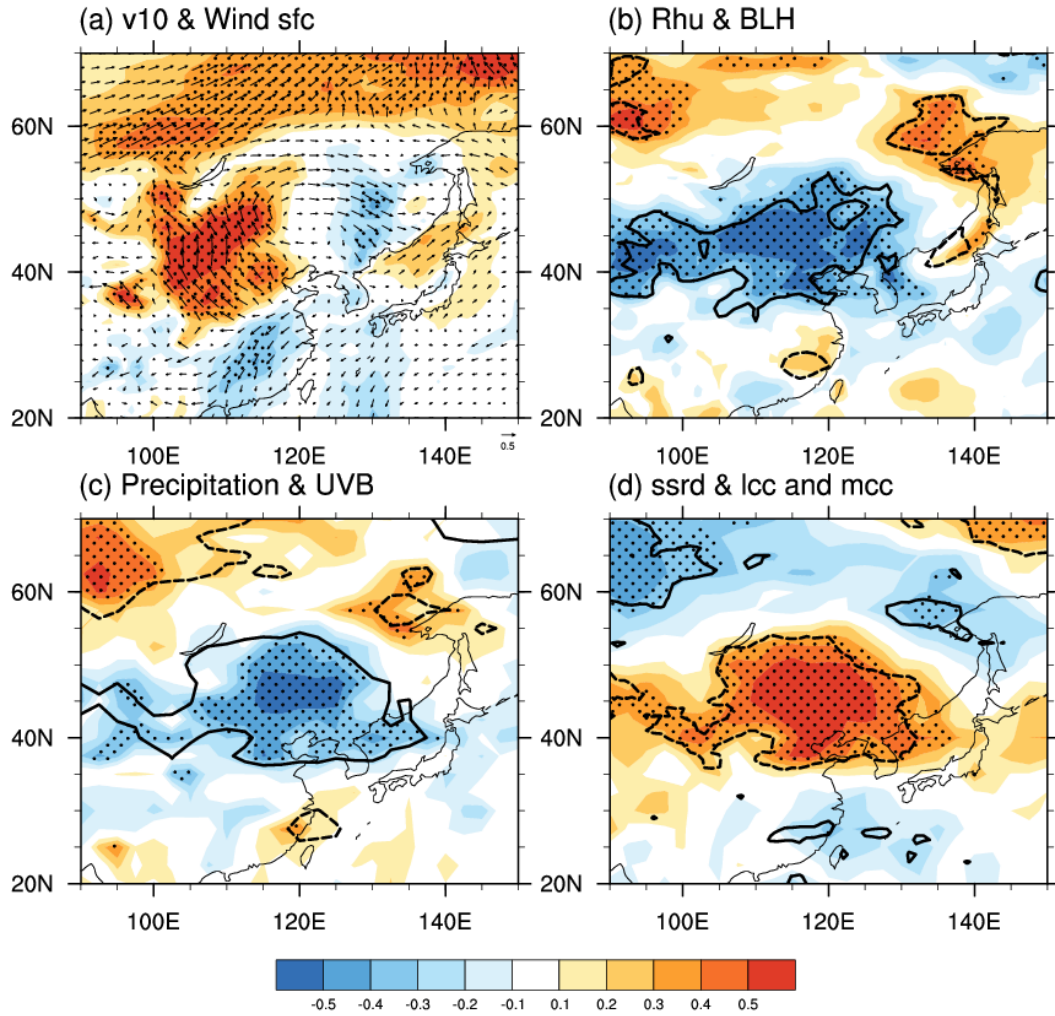

Figure 59. The associated meteorological conditions. (a) The correlation coefficients between the JJA mean OWI and v wind at 10 m (shading), surface wind (arrow), (b) relative humidity near the surface (shading), boundary layer height (contour), (c) precipitation (shading), downward UV radiation at the surface (contour), (d) downward solar radiation at the surface (shading), sum of low and medium cloud cover (contour) from 1979 to 2017. The black dots indicate that the CC with temperature was above the 95% confidence level. The contours plotted in panel (b–d) exceeded the 95% confidence level. The data used here are ERA-Interim datasets.



(a) OWI & Sea Ice

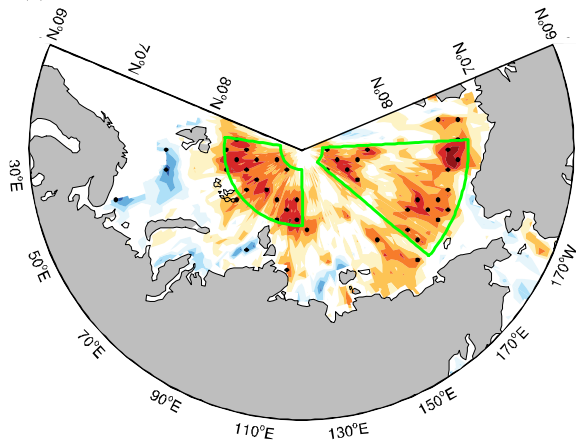

(b) SI index & EU & MDA8

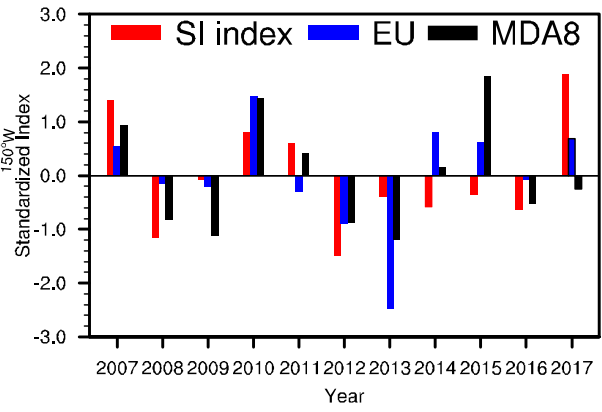

(c) SAT & Z500

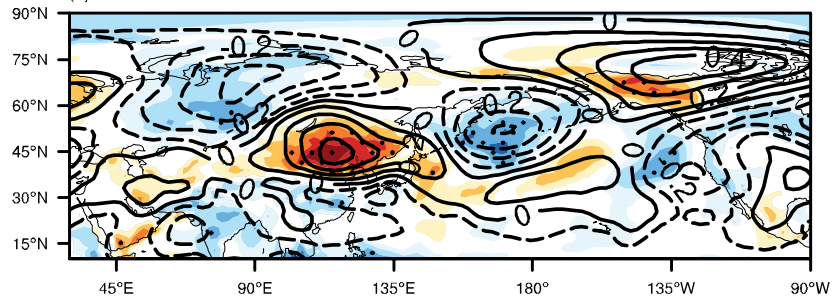

(d) Precipitation & wind sfc

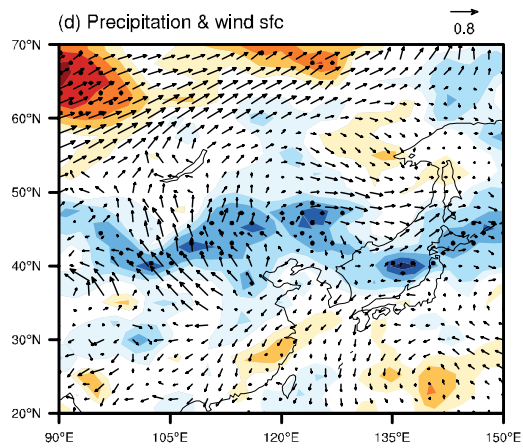

(e) UVB & mcc and lcc

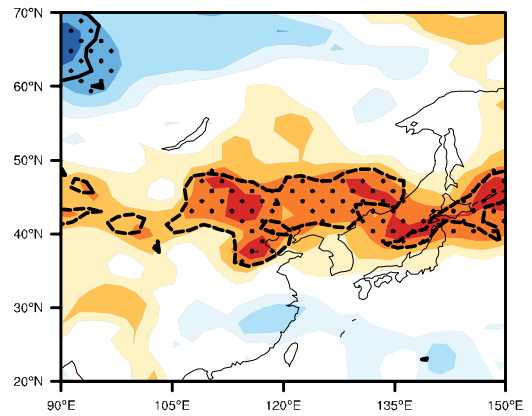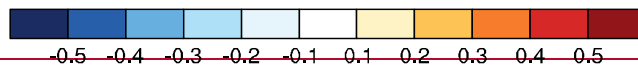

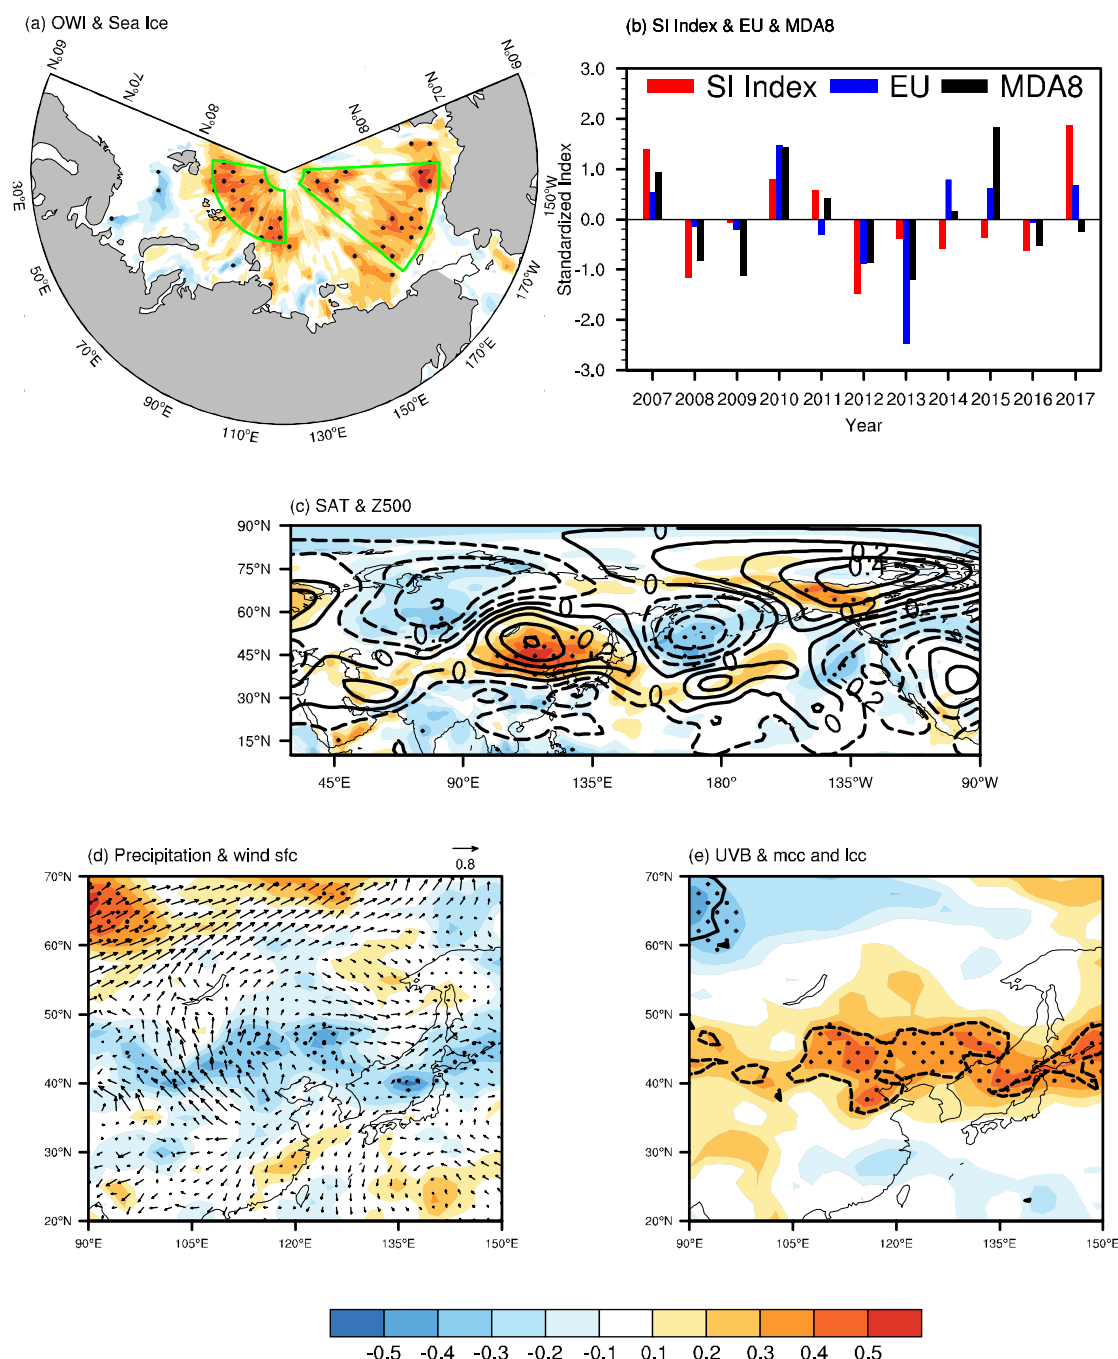

Figure 610. The role of the Arctic sea ice. (a) The correlation coefficients between the JJA mean OWI and May sea ice, (b) The variation of the May SI index (red bar, area-averaged sea ice of the green boxes in panel a), JJA mean EUTPEU pattern index (blue bar) and JJA mean observational SDZ MDA8 (black bar) from 2007 to 2017. (c) The correlation coefficients between the May SI index and surface air temperature (shading), geopotential height at 500 hPa (contour) from 1979 to 2017. The black dots indicate that the CC with surface air temperature was above the 95% confidence level. (d) The correlation coefficients between the May SI index and precipitation (shading), surface wind (arrow), (e) downward UV radiation at the surface (shading) and sum of low and medium cloud cover (contour) from 1979 to 2017. The black dots indicate that the shading CC with precipitation (d) and downward UV radiation (e) was above the 95% confidence level. The data used here are ERA-Interim datasets.

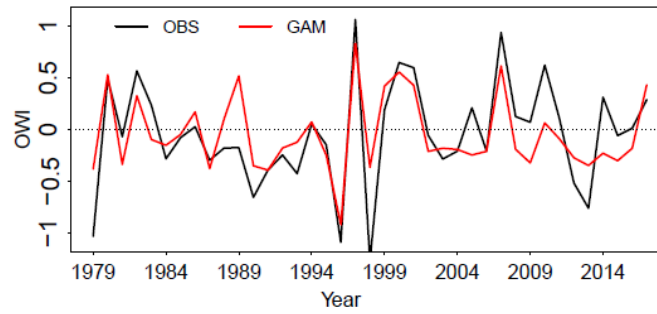

Figure 11. The variation in the observational OWI (black) and the fitted OWI by the generalized additive model (red) from 1979 to 2017

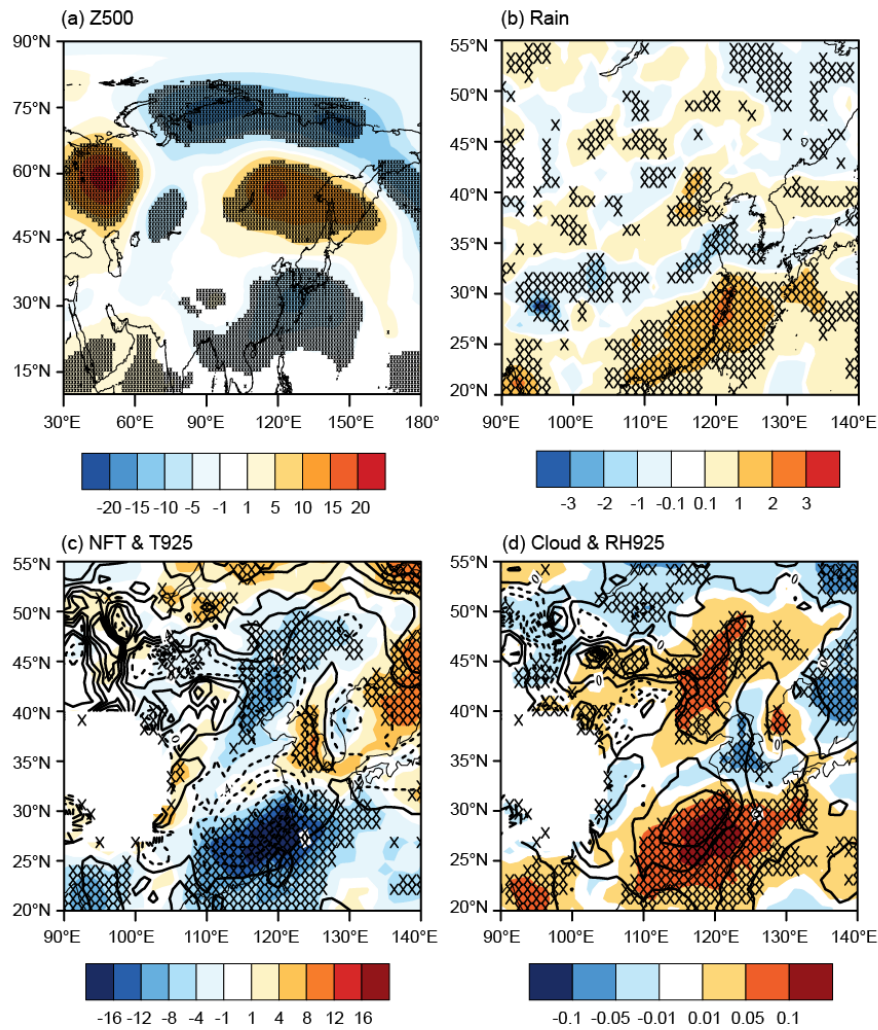

Figure 12. Composite results of the LowASI experiments (LowASI minus Ctrl) by the CAM5 model: (a) geopotential height at 500 hPa, (b) precipitation, (c) net radiative flux at the top of the atmosphere (shading) and temperature at 925 hPa (contour), and (d) sum of low and medium cloud fraction (shading) and relative humidity at 925 hPa (contour). The black hatching denotes the differences with shading were above the 95% confidence level (t-test).
