# Supplementary material for: Arctic sea ice, Eurasia teleconnection pattern and summer surface ozone pollution in North China
Source: Copernicus journal article supplement (doi:10.5194/acp-2018-1127), 2018-11-19
Supplement: Supplementary file [file acp-2018-1127-AC1-supplement.zip]

## **Response to Reviewer #1**

### **Summary:**

This paper uses a combination of observation and reanalysis data to investigate the possible impact of large-scale meteorological conditions on surface air quality (specifically ozone) in North China. Arctic sea ice concentrations in the spring are identified as a driver of the Eurasian teleconnection pattern which during the negative phase leads to meteorological conditions which are favorable to the photochemical production of ozone over North China.

While I find this may be a novel result, I find this study lacks substance that demonstrates to me that the authors fully understand how they have come to these conclusions. I recommend the manuscript undergoes major revisions to include more details.

### **Major Comments:**

- 1. The paper is very short compared to the number of figures included (6 Figures plus 12 in the supplement). It reads to me like a “Letters” type of paper (i.e., Geophysical Research Letters) where one has a new time-sensitive idea or maybe a Nature or Science paper, where the article itself is short but the detailed description of data/methods/etc are in a supplemental at the end. However, this manuscript is short and lacks the detailed description of the data and methods and discussing the results in the greater context of current literature as I would expect from an ACP article.**

### ***Reply:***

The manuscript has been revised according to the ACP format.

- (1) In the revised version, the main texts of this article lengthened about **35%, i.e., from 220 lines to 290 lines.**
- (2) The number of the Figures were **12** in the revised version, instead of 6 in the old version, in the main body.
- (3) Both of the description of the data and methods and the discussion of the results were **rewritten and were recognized.**

### ***Revision:***

The revised manuscript without and with tracks were both uploaded for review.

- 2. I found the Introduction section haphazard without a clear focus. Take the time to clearly outline and describe each idea. It jumps from ozone in China (Line 27) to European clean air laws (Line 28; could talk about US Clean Air act too) back to China (Line 30), to finally talking about how ozone is formed**

(Line 32), to how the NAO impacts European ozone (Line 34) to North American ozone and the jet stream position (Line 35-36), back to Asia (Line 36) and briefly mentions the Eurasia teleconnection pattern (line 41). Each one of these ideas could be and should be expanded on.

***Reply:***

According to the reviewer's suggestion, the introductions were **entirely revised and rewritten** now.

(1) the introduction of European clean air laws was confusing, and now was deleted. Thus, the introduction of the ozone polluted features **focused on those in China**.

(2) In the second paragraph of the introduction, the ideas how the climate anomalies (e.g., NAO, jet stream, west Pacific subtropical high and East Asia summer monsoon) were **expanded on**. The details can be found in the following revisions attached.

(3) Due to insufficient studies, related to how the climate anomalies impacted the ozone pollutions in China, some closely findings in North American were still introduced. Indeed, the findings, such as NAO-ozone in Europe and jet stream-ozone on North American, provided meaningful and substantial clues to our studies.

***Revision:***

...For example, the prevailing positive phase of the North Atlantic Oscillation contributed to the increasing ozone concentration in western and northern Europe, through the anomalous atmospheric circulations to influence regional photochemical processes (Christoudias et al., 2012; Pausata et al., 2012)...

...The summer surface O<sub>3</sub> variability in North America is significantly modulated by the position of the jet stream (Lin et al., 2014). Barnes and Fiore (2013) pointed out jet position may dynamically modulate surface ozone variability in eastern North America and other northern mid-latitude regions...

...A strong positive correlation between the East Asian summer monsoon and summer mean ozone existed. The model simulation by Yang et al. (2014) illustrated that the changes in meteorological parameters, associated with East Asian summer monsoon, lead to 2–5% interannual variations of surface O<sub>3</sub> concentrations over central eastern China. Focusing on the dataset in 2014, a significantly strong west Pacific subtropical high resulted in higher relative humidity, more clouds, more rainfall, less ultraviolet radiation and lower air temperatures, which were unfavourable for the formation of O<sub>3</sub> (Zhao and Wang, 2017)...

***Revision with tracks were also posted:***

~~There is rarely a direct discharge of s~~Surface O<sub>3</sub> ~~is a secondary pollutant~~. The precursors of O<sub>3</sub> (e.g. NO<sub>x</sub> and VOC) photochemically react to generate O<sub>3</sub> under suitable weather conditions, ~~i.e., hot-day and sunny environments~~ (An et al., 2009). ~~Sedimentation~~Surface deposition, dynamic transport and ~~attenuation-dispersion~~ of O<sub>3</sub> are ~~also~~ closely related to atmospheric circulations. ~~For example, The North Atlantic Oscillation intercontinentally affects surface O<sub>3</sub> concentrations over Europe (Christoudias et al., 2012; Pausata et al., 2012)the prevailing positive phase of the North Atlantic Oscillation contributed to the increasing ozone concentration in western and northern Europe, through the anomalous atmospheric circulations to influence regional photochemical processes (Christoudias et al., 2012; Pausata et al., 2012).~~ The summer surface O<sub>3</sub> variability in North America is significantly modulated by the position of the jet stream (~~Barnes and Fiore, 2013; Lin et al., 2015~~2014). ~~Barnes and Fiore (2013) pointed out jet position may dynamically modulate surface ozone variability in eastern North America and other northern mid-latitude regions.~~ A strong positive correlation between the East Asian summer monsoon and summer mean ozone existed ~~during 1986–2006, based on numerical model results (Yang et al., 2014). The model simulation by Yang et al. (2014) illustrated that the changes in meteorological parameters, associated with East Asian summer monsoon, lead to 2–5% interannual variations of surface O<sub>3</sub> concentrations over central eastern China. Focusing on the dataset in 2014, Aa~~ significantly strong west Pacific subtropical high resulted in higher relative humidity, more clouds, more rainfall, less ultraviolet radiation and lower air temperatures, which were ~~unfavorable~~unfavourable for the formation of O<sub>3</sub> (Zhao and Wang, 2017). ~~The photochemical reaction was the main local sources of O<sub>3</sub>. The hot and dry environments and the violent solar radiation could accelerate the chemical conversion from the precursor to O<sub>3</sub> (An et al., 2009; Tong et al., 2017).~~ In 2013, a severe heat wave, ~~with highest temperature 41.1 °C~~, contributed to the high O<sub>3</sub> concentration in the Yangtze River Delta (Pu et

3. The Wang and He (2015) EU calculation was adapted from the EU pattern of Wallace and Gutzler (1981). Does the reason they adapted the equation apply for this project? Which calculation was used in the citations in the Introduction (line 42) versus in the Methods section (Line 73)? A full description in the introduction regarding the EU original teleconnection pattern and the characteristics of its positive and negative phases are not described or illustrated and this would be beneficial for the Section 4 and 5. Perhaps a useful reference would be Wang, N. & Zhang, Y. Clim Dyn (2015) 44: 1017. <https://doi.org/10.1007/s00382-014-2171-z>

**Reply:**

- (1) The reference, fully described the EU pattern in winter, substantially helped us to understand the impacts of EU in the Asian climate and was **detailedly introduced**.
- (2) However, the season Wang and Zhang (2015) and Wallace and Gutzler (1981) concerned is winter.
- (3) Wang and He (2015) regarded the **summer EU pattern** as the main reason for the severe summer drought in North China in 2014. Considering the **seasonal change** of the EU pattern's location, the calculation procedure for the EU index here was adapted from Wang and He (2015).

**Revision:**

...The EU pattern is a major teleconnection pattern in the Northern Hemisphere and appears in all seasons. **Wang and Zhang (2015)** used the method defined by Wallace and Gutzler (1981) to calculate the EU pattern index in winter and pointed out that the positive EU phase is associated with a cold-dry climate in East China, vice versa. Meanwhile, Wang and He (2015) regarded the summer EU pattern as the main reason for the severe summer drought in North China in 2014. Considering the seasonal change of the EU pattern's location, the calculation procedure for the EU index here was consistent with that in Wang and He (2015)...

Wang, N., Zhang, Y.: Evolution of Eurasian teleconnection pattern and its relationship to climate anomalies in China. *Climate Dynamics*, 44(3-4):1017-1028. 2015

- 4. The first portion of the Results section refer to figures in the supplemental and are actually referred to before Figure 1 (Lines 79-100). Notes to the authors from ACP states “The supplement shall contain only complementary information but no scientific interpretations or findings/messages that would go beyond the contents of the manuscript.” Consider including Figure S1 at least in the main body of the text. Figures S6, S7 and S8 are also referenced in the results sections as more than complementary analysis to the main findings and should be considered for the main text.**

**Reply:**

The Figure S1, S6, S7, S8 and S11 were **moved to the main text** in the revised version. Now, there were 12 Figures in the main text and 6 Figures in the supplemental information.

**Revision:**

The mentioned Figures were Figure 1, 3, 5, 8 and 11 in the revised manuscript.

- 5. Of the figures in the main text, some improvements should be made in order for the reader to follow along with the results in Sections 4 and 5.**

**5.1 In Figure 1g, h, which temperature is color and which is contoured?**

**Reply:**

The negligence was revived. The SAT is with shading and the temperature at 200 hPa is contoured.

**Revision:**

Figure 2...(g-h) SAT (shading), and temperature at 200 hPa (contour)...

**5.2 It is hard to see the Wind arrows in some of the plots (Figure 1a,b and Figure 4), consider rescaling or decluttering?**

**Reply:**

The wind arrows were **enlarged**, i.e., rescaling and decluttering. The corresponding Figures in the supplementary information were also revised.

**Revision:**

These composites were calculated using the ERA-Interim datasets...

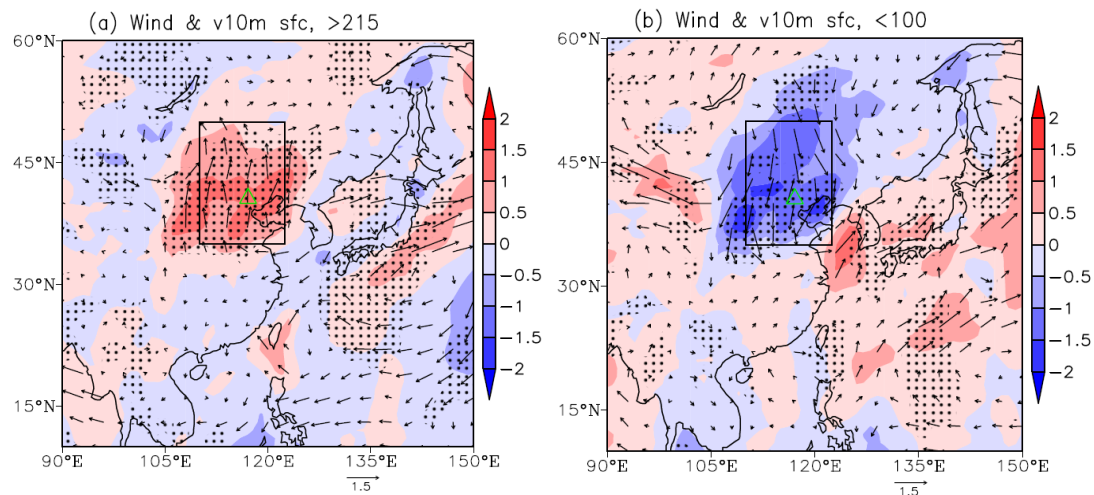

...(a-b) surface wind (arrow) and v-wind (shading)...

...The green triangle in panel (a-b) illustrates the location of the Shangdianzi site...

These composites were calculated using the NCEP/NCAR datasets...

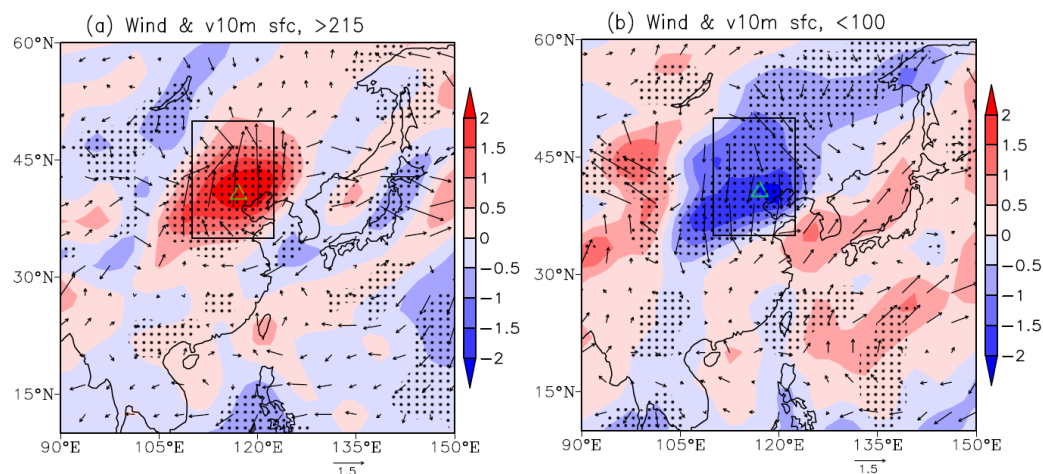

...(a-b) surface wind (arrow) and v-wind (shading)...

...The green triangle in panel (a-b) illustrates the location of the Shangdianzi site...



Figure 4 in the old version were revised and is Figure 7 now.

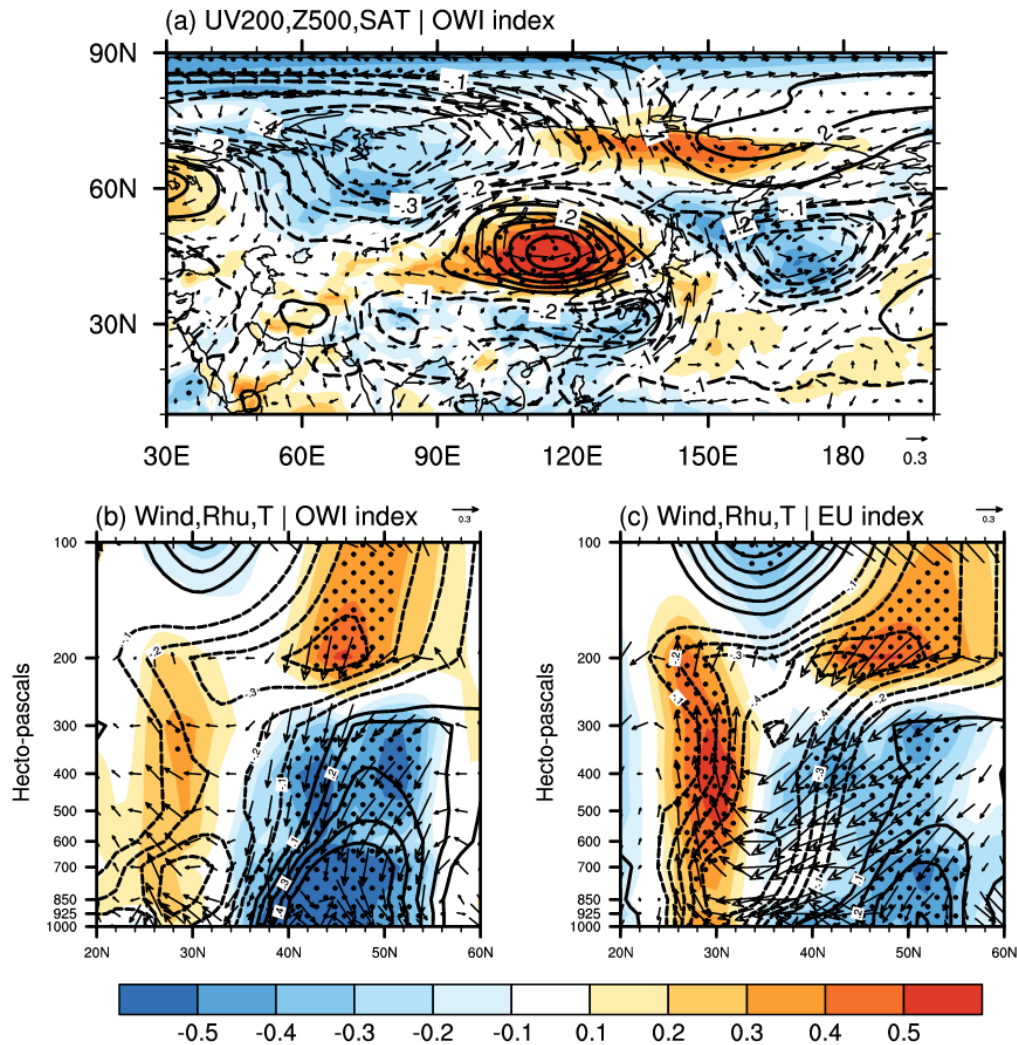

Figure 7. The associated atmospheric circulation. (a) The correlation coefficients between the JJA mean OWI and surface air temperature (shading), wind (arrow) at 200 hPa and geopotential height at 500 hPa (contour) from 1979 to 2017. The black dots indicate that the CC with surface air temperature was above the 95% confidence level. The cross-section (110 °–125 °E mean) correlation coefficients between JJA mean OWI (a), EU pattern index (b) and relative humidity (shading), temperature (contour), wind (arrow, vertical speed multiplied by 100) from 1979 to 2017. The black dots indicate that the CC with relative humidity exceeded the 95% confidence level (t test). The data used here are ERA-Interim datasets.

**5.3 In the figure captions with the contours, it is not stated what are the contour intervals. In some of the supplemental figures the contours are labelled. Either label or define (e.g., is dashed for negative in Figure 4a?).**

**Reply:**

The labels of the contours were added in the revised manuscript.

**Revision:**

Please see the above attached Figure 7 (i.e., Figure 4 in the former version).

The revised Figure S4 in the supplementary materials were also attached below.

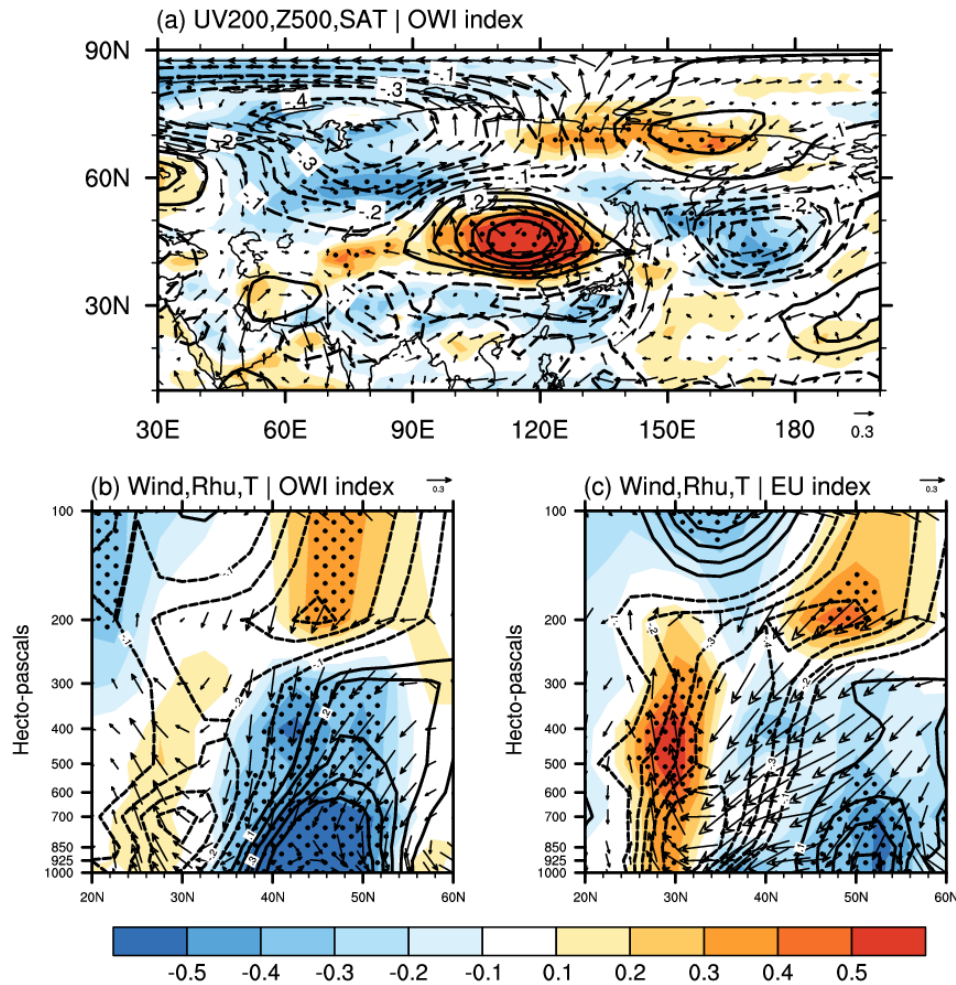

**Figure S4.** The associated atmospheric circulation. (a) The correlation coefficients between the JJA mean OWI and surface air temperature (shading), wind (arrow) at 200 hPa and geopotential height at 500 hPa (contour) from 1979 to 2017. The black dots indicate that the CC with surface air temperature was above the 95% confidence level. The cross-section (110°–125°E mean) correlation coefficients between JJA mean OWI (a), EUTP index (b) and relative humidity (shading), temperature (contour), wind (arrow, vertical speed multiplied by 100) from 1979 to 2017. The black dots indicate the CC with relative humidity exceeding the 95% confidence level (t test). The data used here are NOAA datasets.

**5.4 Some of the figures are too small or the shading is too dark (saturated) or the presence of wind arrows makes it difficult to see the dotted significant areas (Figs 4, 5, 6c,d).**

**Reply:**

The related Figures were re-plotted. The wind arrows were enlarged, the color bar of shading was improved, i.e., **the saturation is modified.**

**Revision:**

The revisions for Figure 4 can be found in the reply to Comments 5.2 and 5.3.

The revised Figure 9 (i.e., Figure 5 in the former version) and Figure 10 (i.e., Figure 6 in the former version) in the supplementary materials were also attached below.

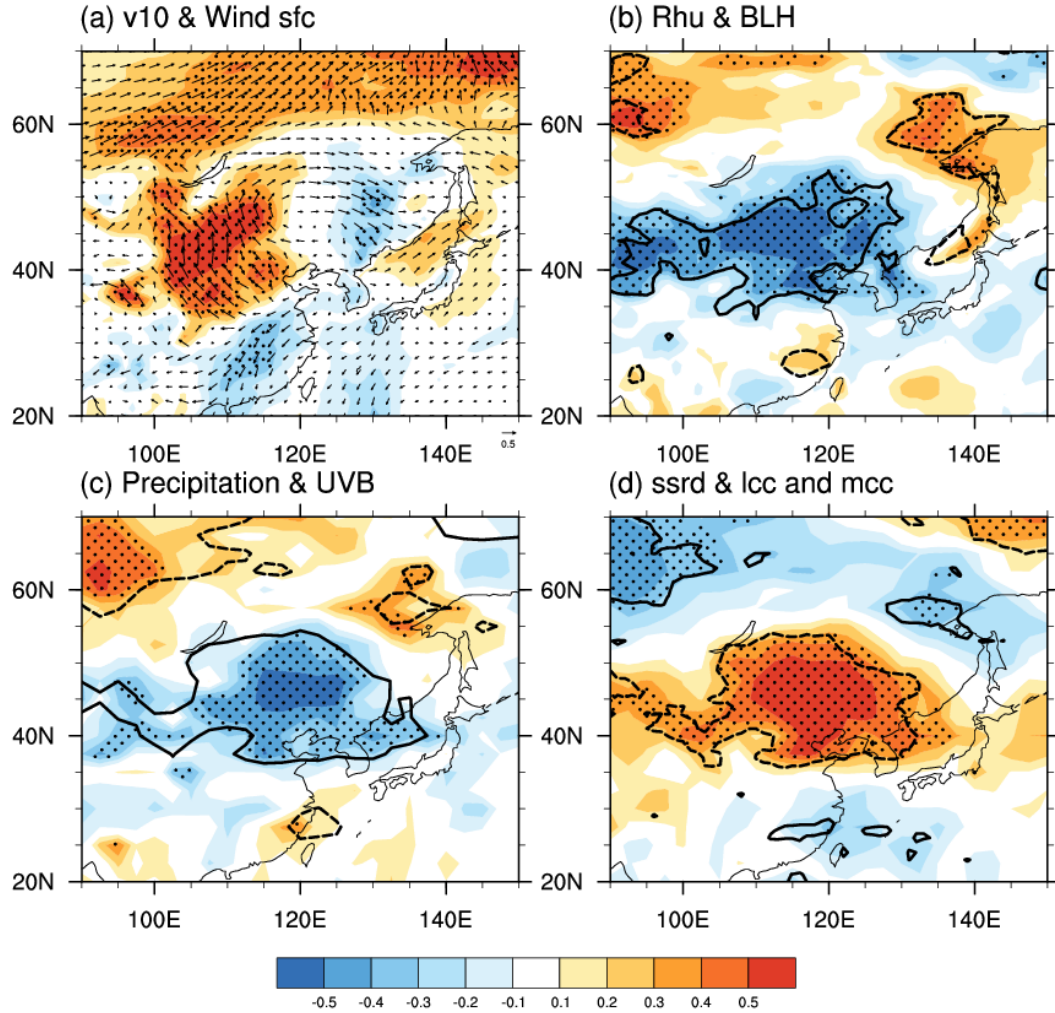

Figure 9. The associated meteorological conditions. (a) The correlation coefficients between the JJA mean OWI and v wind at 10 m (shading), surface wind (arrow), (b) relative humidity near the surface (shading), boundary layer height (contour), (c) precipitation (shading), downward UV radiation at the surface (contour), (d) downward solar radiation at the surface (shading), sum of low and medium cloud cover (contour) from 1979 to 2017. The black dots indicate that the CC with temperature was above the 95% confidence level. The contours plotted in panel (b–d) exceeded the 95% confidence level. The data used here are ERA-Interim datasets.



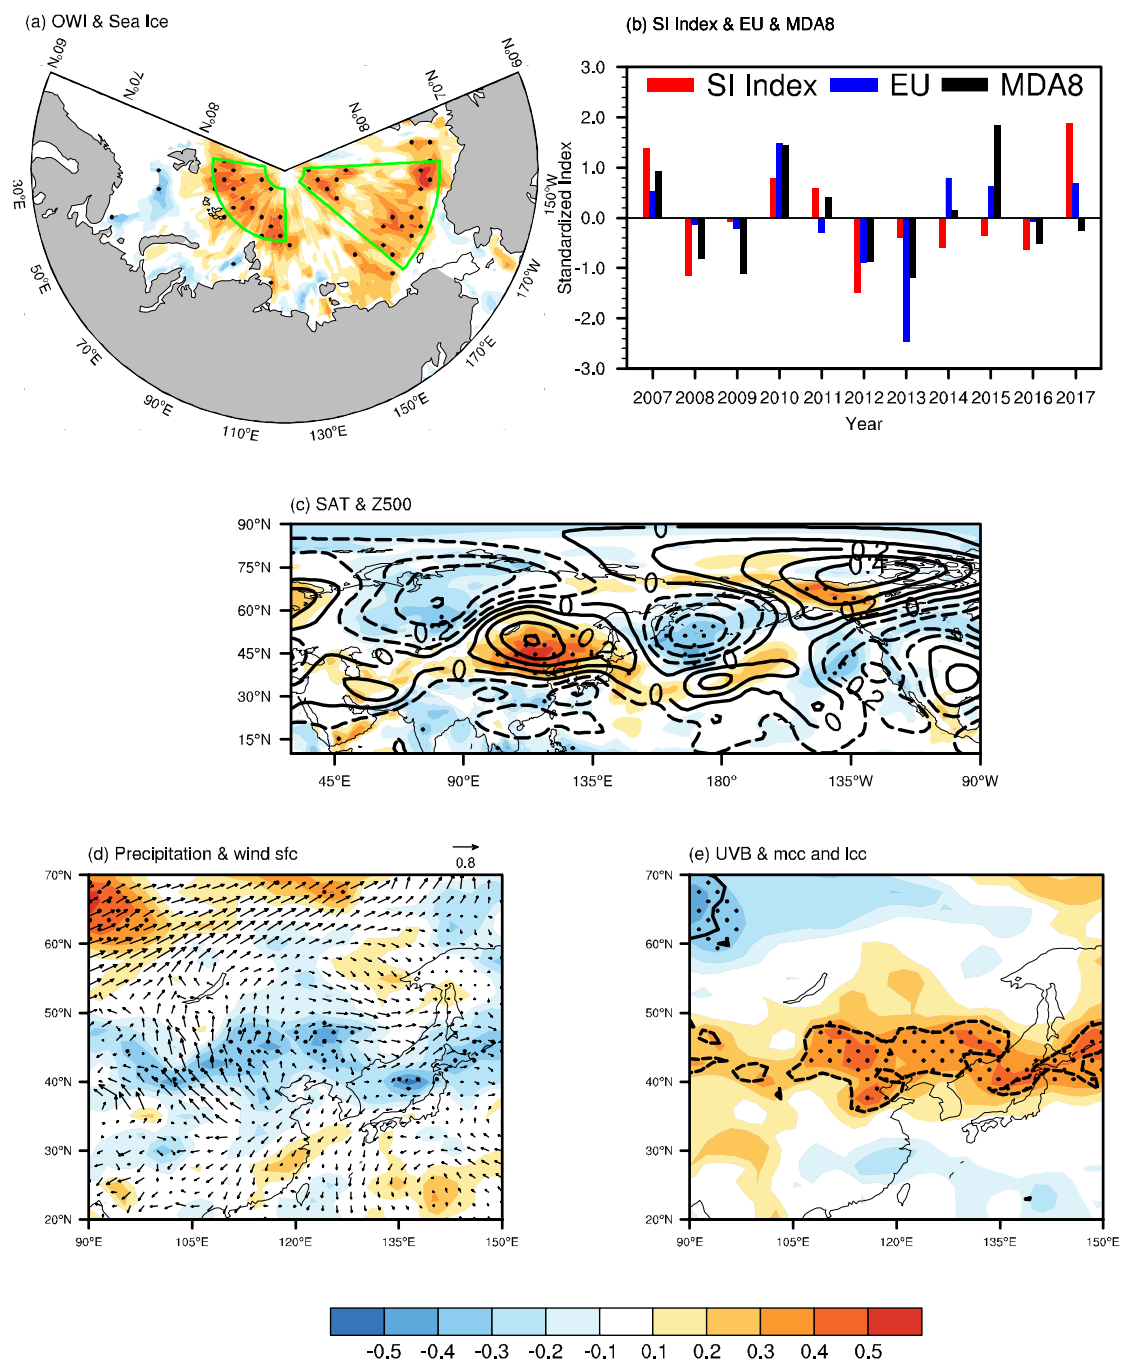

Figure 10. The role of the Arctic sea ice. (a) The correlation coefficients between the JJA mean OWI and May sea ice, (b) The variation of the May SI index (red bar, area-averaged sea ice of the green boxes in panel a), JJA mean EU pattern index (blue bar) and JJA mean observational SDZ MDA8 (black bar) from 2007 to 2017. (c) The correlation coefficients between the May SI index and surface air temperature (shading), geopotential height at 500 hPa (contour) from 1979 to 2017. The black dots indicate that the CC with surface air temperature was above the 95% confidence level. (d) The correlation coefficients between the May SI index and precipitation (shading), surface wind (arrow), (e) downward UV radiation at the surface (shading) and sum of low and medium cloud cover (contour) from 1979 to 2017. The black dots indicate that the shading CC with precipitation (d) and downward UV radiation (e) was above the 95% confidence level. The data used here are ERA-Interim datasets.

**5.5 As for the supplemental, I do not understand the blue lines in Figure S2, and the labelling of the xaxis (does it start June 2006 or June 2007, the tick makes no sense with the figure caption).**

**Reply:**

The data were JJA 2007, JJA 2008....Actually, they were not temporally continuous. Thus the blue lines were plotted to **separate the data in different years**. The citation of Figure S1 was improved to include more explanation, as follows:

**Revision:**

Figure S1. The variation in the SDZ MDA8 from June to August during 2007–2017. **The blue lines were used to divide the data in different years. For example, the data on two sides of the first lines were belonged to JJA 2007 and JJA 2008, respectively.**

**5.6 I also do not know how to read figure S3 (maybe a table would be better?). It looks to me like the histogram has been cut off and values well above 90 should be shown.**

**Reply:**

According to the reviewer's advice, the Figure was **changed to Table S1**, which was much clearer to show the variation in the number of MOP and NOP.

**Revision:**

Table S1. The number of days with MOP and NOP events.

|            | 2007 | 2008 | 2009 | 2010 | 2011 | 2012 | 2013 | 2014 | 2015 | 2016 | 2017 | Mean |
|------------|------|------|------|------|------|------|------|------|------|------|------|------|
| <b>MOP</b> | 22   | 8    | 8    | 24   | 14   | 9    | 10   | 11   | 26   | 11   | 12   | 14   |
| <b>NOP</b> | 4    | 12   | 12   | 8    | 4    | 17   | 22   | 9    | 4    | 18   | 16   | 11.5 |

**6. Throughout the manuscript, both ERA-Interim and NCEP/NCAR reanalysis data (referred to as NOAA data in the paper, but more commonly referred to as NCEP/NCAR reanalysis) are used, with ERA-Interim being used as the main result and NCEP/NCAR reanalysis shown in the supplemental.**

**In a similar vein, it is said that Shangdianzi station (SDZ) is one of three regional background stations in China (Line 56); Is it possible to use the other two stations to test the OWI methods?**

**Reply:**

- (1) The expression of NOAA data has been **changed to the NCEP/NCAR** data throughout the MS.
- (2) The other two regional background stations in China are Longfengshan in Heilongjiang province and Lin'an to the southwest of Shanghai, which are quite far away from the North China and are **uncorrelated to this study**. Furthermore, the

data from the regional background stations were not public, and we did not gain the data in the other stations.

**Revision:**

The daily mean and monthly mean ERA-Interim data were directly downloaded from the ERA-Interim website analyzed in this study. Furthermore, the daily mean and monthly reanalysis datasets supported by the National Oceanic and Atmospheric Administration (~~NOAA~~) were also employed and denoted as NOAA-NCEP/NCAR (National Center for Environmental Prediction and the National Center for Atmospheric Research) data. The 2.5°×2.5° geopotential height (Z), zonal and meridional wind, relative humidity, vertical velocity, air temperature at different pressure levels, SAT and wind, downward UV radiation, downward solar radiation, low and medium cloud cover were downloaded ~~from the National Center for Environmental Prediction and the National Center for Atmospheric Research~~ (Kalnay et al. 1996). The BLH of NCEP/NCAR dataset was only available from 1979 to 2014 in ~~the NOAA data was derived from the website of~~ the NOAA-CIRES 20th Century Reanalysis version 2c (Giese et al., 2016). The daily precipitation data was from the CPC global analysis of the daily precipitation dataset (Chen et al., 2008). ↵

- 7. In Section 3, the boxed regions that are used for the OWI calculations are shown in Figure 1. Make a better connection between these boxed regions in the text to the respective figure and also state that SDZ is located within these boxes. This is why you are doing the correlation coefficient between the SDZ ozone concentrations to the meteorological fields within these boxes, right? The boxes look to fit the maximum correlation for the shaded composite fields and therefore are different sizes. Can the authors discuss more as to the methods which lead to these boxed regions?**

**Reply:**

- (1) The location of Shangdianzi station was also plotted in Figure 2, i.e., **the green triangle, to enhance the connection.**
- (2) The process of calculate the meteorological index is added. The important point is the method to ensure the boxed region. Simply, **the averaging area for meteorological indexes were the regions with most significantly different elements** in the composites of MOP and NOP events. Because the box was chosen for each element, the boxes was a little different, but still near the North china.

**Revision:**

- (1) ...During calculating the correlation coefficients with the meteorological conditions, the averaging area for meteorological indexes were the regions with most significantly different elements in the composites of MOP and NOP events...
- (2) ...The green triangle in panel (a-b) illustrates the location of the Shangdianzi site...

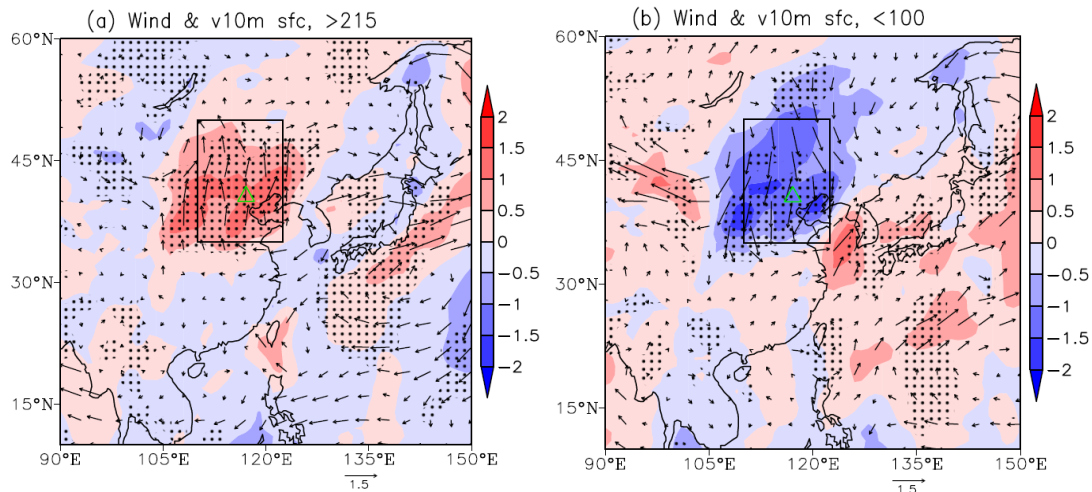

8. At the start of Section 4, the authors state “After 1979, the quality of the reanalysis data was improved to support studies of climate variability and change.” This isn’t quite true, the quality of reanalysis data improved for the period in the datasets after the assimilation of satellite data, which was made possible starting in 1979. The NCEP/NCAR reanalysis covers the period prior to the satellite era, therefore studies of climate variability and change must take into consideration the introduction of satellite data as well as subsequent changes in the observation system (introduction of new satellites and when satellites are no longer in operation). This needs to be properly addressed in the paper.

**Reply:**

The original presentation was confusing and not accurate. According to the reviewer’s suggestion, the error was revised.

**Revision:**

...After the assimilation of satellite data, possible in 1979, the quality of the reanalysis data was improved...

9. In Section 5, only the month of May sea ice is discussed. Did the authors investigated other lag periods?

Is there literature that describes the interaction between sea ice concentrations and large-scale atmospheric circulation that can be referenced in this manuscript?

**Reply:**

(1) The other lag periods were also studied during our research. In the other months, i.e., from December to April, the sea ice anomalies did not show closely connections

with the JJA mean OWI (Figure R1). Related discussions were added in the revised manuscript.

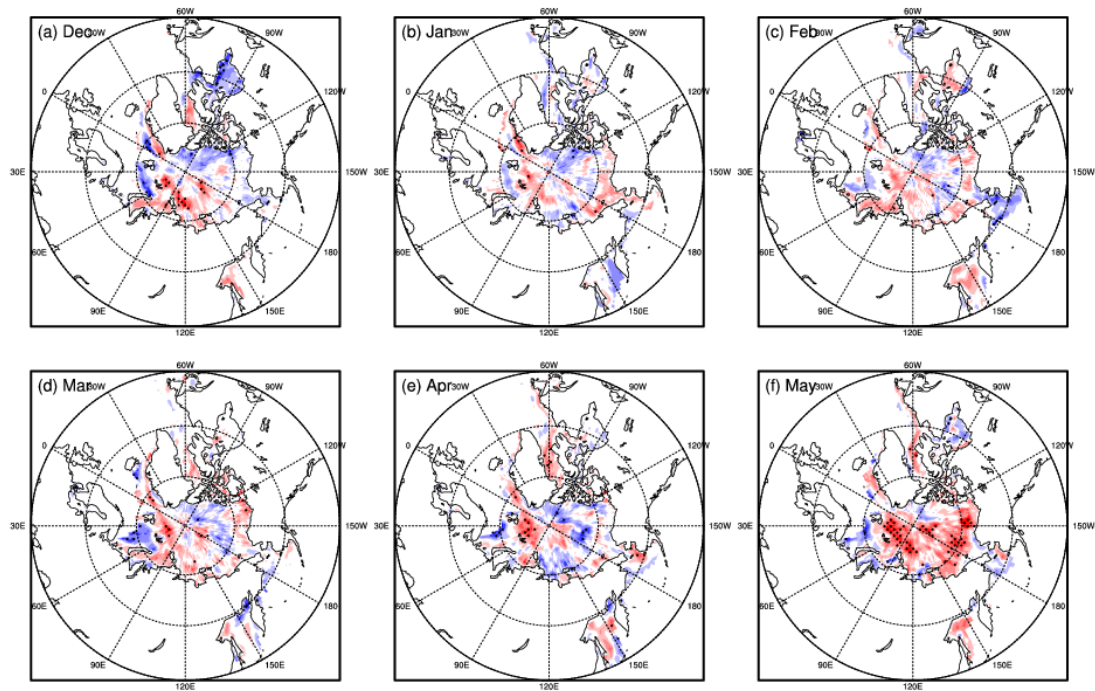

Figure R1. The correlation coefficients between the JJA mean OWI and December (a), January (b), February (c), March (d), April (e) and May (f) sea ice concentration.

(2) The literature that describes the interaction between sea ice concentrations and large-scale atmospheric circulation were referenced in the revised manuscript.

#### **Revision:**

(1) The correlation between the sea ice and JJA OWI was monthly checked (Figure omitted), and we found the interannual variation of OWI was significantly correlated with May sea ice conditions to the north of Eurasia, especially near the Gakkel Ridge, the Canada Basin and the Beaufort Sea (Figure 10a).

(2) The EU pattern originated from the Arctic region. The preceding sea ice anomalies could stimulate atmospheric responses like EU pattern in summer (Wang and He, 2015). Thus, the role of Arctic sea ice on the OWI was also explored in this study.

#### **Minor Comments:**

**Line 26: smog is visible to humans and ozone is a key ingredient to smog.**

#### **Reply:**

According to the reviewer's advice, the discussion about the visibility was **deleted**.

#### **Revision:**



Due to drastic air pollution control in China since 2013, haze pollutions are being controlled in recent years (The environmental statistics unit of stat-centre in Peking University, 2018), appearing as sharp decreasing in fine particulate matter (PM<sub>2.5</sub>). However, surface O<sub>3</sub> pollution, which always occurred on clear and sunny days (Wang et al., 2017), has not improved (Li et al., 2018).

(O<sub>3</sub>) pollution in summer (Ma et al., 2016; Tang et al., 2018). Due to ~~drastic air pollution control in China since 2013, the low visibility it caused and its obvious unusual smell~~, haze pollution ~~easily causes warning and~~ are being controlled in recent years (The environmental statistics unit of stat-~~center~~centre in Peking University, 2018), ~~appearing as sharp decreasing in fine particulate matter (PM<sub>2.5</sub>)~~. However, surface O<sub>3</sub> pollution, ~~which has~~ always occurred on clear and sunny days (Wang et al., 2017), ~~so it is not visible to humans~~ ~~has not improved (Li et al., 2018)~~. ~~The negative effects of surface O<sub>3</sub> pollution was not~~

**Line 27-28: Can you provide any references which have looked at ozone pollution in China linked to climate variability**

**Reply:**

A reference was cited.

**Revision:**

... but the impacts of climate variability on surface O<sub>3</sub> pollution in China (Yang et al, 2014) have not been sufficiently studied...

**Line 28: ‘benefitted’ with two t’s is the British spelling.**

**Line 28: Provide a reference and further details on the European ‘rigorous air protection act’ and what you mean by ‘maintained good air quality’ and in the same sentence ‘ozone levels are increasing’.**

**Reply:**

(1) According to the major comment 2, the introduction of European clean air laws was deleted.

(2) Thus, the word “benefitted” was concomitantly deleted.

**Revision:**

2017), ~~so it is not visible to humans~~ ~~has not improved (Li et al., 2018)~~. ~~The negative effects of surface O<sub>3</sub> pollution was not weaker than those of haze (Liu et al., 2018), but the impacts of climate variability features and causes of on surface O<sub>3</sub> pollution in China, especially (Yang et al, 2014) – the impacts of climate variability, have not been sufficiently studied. Europe has benefitted from its rigorous air protection act and maintained good air quality, but the surface ozone levels still showed significant increases during 1995–2012 (Yan et al., 2017). In the major urban areas in China, the surface O<sub>3</sub> concentrations~~

**Line 30: is the ambient air quality standard set by China or the World Health Organization? Please define and reference.**

**Reply:**

The information has been added in the text. It is the standard in China.

**Revision:**

...the surface O<sub>3</sub> concentrations exceeded the ambient air quality standard of China (i.e., 100 µg/m<sup>3</sup>) by 100–200 % (Wang et al., 2017)...

**Line 31: Can you define North China, or indicate it on a map? It is confusing as on Line 93 it is written ‘in the north of China, especially in North China’.**

**Reply:**

(1) According to the reviewer’s advice, the range of North China was plotted in Figure 1h and 5d.

(2) Line 93 was rewritten.

**Revision:**

...The distribution of correlation coefficients is similar to the MDA8 on Figure 1 (a, c, e, g). The SDZ MDA8 significantly covaried with the MDA8 in North China in summer...

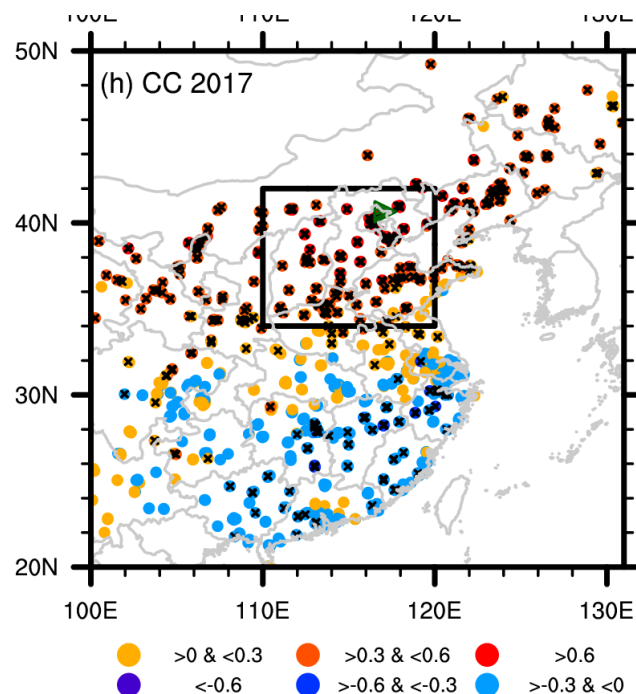

The black box in panel h is the range of North China.

**Line 32: What do you mean by discharge?**

**Reply:**

It should be emission. According to the other reviewer's advice, this sentence was modified to "Surface O<sub>3</sub> is a secondary pollutant".

**Revision:**

Surface O<sub>3</sub> is a secondary pollutant...

**Line 33: Describe the suitable weather conditions here, versus later in Lines 38-39 describing in detail the unfavorable weather conditions for ozone formation.**

**Reply:**

The suitable and unfavorable weather were explained in the revised MS.

**Revision:**

...The precursors of O<sub>3</sub> (e.g. NO<sub>x</sub> and VOC) photochemically react to generate O<sub>3</sub> under suitable weather conditions, i.e., hot-day and sunny environments (An et al., 2009)...

...Focusing on the dataset in 2014, a significantly strong west Pacific subtropical high resulted in higher relative humidity, more clouds, more rainfall, less ultraviolet radiation and lower air temperatures, which were unfavourable for the formation of O<sub>3</sub> (Zhao and Wang, 2017)...

**Line 41: Is it more common in the literature to refer to this teleconnection pattern simply as EU? In some of the figures EU is used. Commit to either using EU throughout or EUTP throughout the manuscript and figures.**

**Reply:**

The abbreviation of Eurasia teleconnection pattern was **unified as EU** throughout the manuscript and figures.

**Revision:**

was constructed, which extends the study period to the historical period before 2007 and the projected future. Here, we show that in addition to anthropogenic emissions, the Eurasia teleconnection pattern (EUTPEU), a major globally significant atmospheric teleconnection pattern, influences surface O<sub>3</sub> pollution in North China on a time scale of climate. The local meteorological conditions associated with the EUTPEU pattern positive phase supported intense and efficient photochemical reactions to produce more surface O<sub>3</sub>. The associated southerlies over North China transported surrounding O<sub>3</sub> precursors to superpose local emissions. Increased S<sub>olar radiation and high temperature during the positive EU phase dramatically enhanced O<sub>3</sub> photochemical reactionsproduction. Furthermore, due to the close connection between the preceding May Arctic sea ice and summer EUTPEU pattern, approximately 60% of the interannual variability of summer surface O<sub>3</sub> pollution was</sub>

**Line 45: Can you list any more recent studies?**

**Reply:**

More recent studies were listed, such as Zhu and Liao (2016) and Gaudel et al., (2018).

**Revision:**

Due to the close relationship between surface O<sub>3</sub> and meteorological conditions, the impacts of climate change on O<sub>3</sub> have been projected by various numerical models (Doherty et al., 2013; Melkonyan and Wagner, 2013; **Zhu and Liao, 2016; Gaudel et al., 2018**).

**Line 45: Why talk about eastern China when the paper is interested in North China. Are there references that look at future ozone in North China?**

**Reply:**

(1) North China was **a part of** eastern China.

(2) Related studies concentrated in North China were quite few, thus we talked about the findings in eastern China. Although these researches were done for the larger region, i.e., eastern China, some findings were appropriate for the ozone pollution in North China. The cited papers actually provided clues to us.

**Line 47: Which “previous studies” are you referring to?**

**Reply:**

Related reference was cited here.

**Revision:**

...However, previous studies mainly focused on observational analyses of several synoptic processes (e.g., Zhao and Wang, 2017), rather than long-term climate diagnostics, because of the lack of long-term surface O<sub>3</sub> observations...

**Line 54-58: Is this ozone data publicly available?**

**Reply:**

The ozone data from 2014 to 2017 were publicly available in the website of the Ministry of Environmental Protection of China.

**Line 58: What is special about the MDA8 calculation of the Technical Regulation on Ambient Air Quality Index that it required referencing it?**

**Reply:**

The MDA8 was the maximum of the **running 8 h mean** O<sub>3</sub> concentrations during 24 hours in the day.

The explanation was supplemented in the revised manuscript.

**Revision:**

...The MDA8 was calculated as the maximum of the running 8 h mean O<sub>3</sub> concentrations during 24 hours in the day...

**Line 62: What is the native resolution of ERA-Interim? Did you download the data to this resolution or regrid it? Did you download it originally at the 6-hour resolution and then created daily and monthly datasets?**

**Reply:**

The resolution of ERA-Interim here is 1 °×1 °.

The daily mean and monthly mean datasets were directly downloaded and used in the manuscript.

**Revision:**

...The 1 °×1 ° ERA-Interim data used here included ... The daily mean and monthly mean ERA-Interim data were directly downloaded from the ERA-Interim website in this study...

**Line 69-70: As stated above, this reanalysis is more commonly referred to as NCEP/NCAR reanalysis.**

**Reply:**

The expression of NOAA data has been changed to the NCEP/NCAR data.

**Revision:**

The daily mean and monthly mean ERA-Interim data were directly downloaded from the ERA-Interim website analyzed in this study. Furthermore, the daily mean and monthly reanalysis datasets supported by the National Oceanic and Atmospheric Administration (~~NOAA~~) were also employed and denoted as NOAA-NCEP/NCAR (National Center for Environmental Prediction and the National Center for Atmospheric Research) data. The 2.5°×2.5° geopotential height (Z), zonal and meridional wind, relative humidity, vertical velocity, air temperature at different pressure levels, SAT and wind, downward UV radiation, downward solar radiation, low and medium cloud cover were downloaded ~~from the National Center for Environmental Prediction and the National Center for Atmospheric Research~~ (Kalnay et al. 1996). The BLH of NCEP/NCAR dataset was only available from 1979 to 2014 in ~~the NOAA data was derived from the website of~~ the NOAA-CIRES 20th Century Reanalysis version 2c (Giese et al., 2016). The daily precipitation data was from the CPC global analysis of the daily precipitation dataset (Chen et al., 2008). ↵

**Line 73: Correct Wang et al to Wang and He.**

**Reply:**

The errors were corrected.



***Revision:***

...the calculation procedure for the EU index here was consistent with that in Wang and He (2015)...

**Line 80: Is it possible to label on a map these three regions?**

***Reply:***

We tried to label these three regions on a map, but the Figure became unclear. To keep the meaning of the sentence and avoid confusion, we finally deleted these three regions.

***Revision:***

...During 2006–2014, O<sub>3</sub> concentrations were only observed in the most developed regions in China...

**Line 82: What is meant by “which appeared to be bordered by the Yangtze River”.**

***Reply:***

This sentence was confusing, and was improved as follows:

***Revision:***

...O<sub>3</sub> concentrations in the high-mid latitudes were higher than those in the lower latitudes, which appeared to be **separated** by the Yangtze River...

**Line 82: ‘rather high’ is subjective. Change to be more qualitative.**

***Reply:***

This sentence was confusing, and was improved as follows:

***Revision:***

...The O<sub>3</sub> concentrations in North China were already high in 2014;...

**Line 86: Who’s threshold?**

***Reply:***

It is the threshold of the server surface O<sub>3</sub> pollution in China.

***Revision:***

...The observations, with maximum MDA8 higher than 265 µg/m<sup>3</sup> (i.e., the threshold of the server surface O<sub>3</sub> pollution in China)...

**Line 89: State that SDZ is labelled on Figure S1a (though really should be in S1b logically since right hand panel compares to SDZ).**

***Reply:***

The location of **SDZ is labelled on panels b, d, f, and h** in Figure 1 now.

**Revision:**

The green triangle in panels b, d, f, and h illustrate the location of the SDZ station.

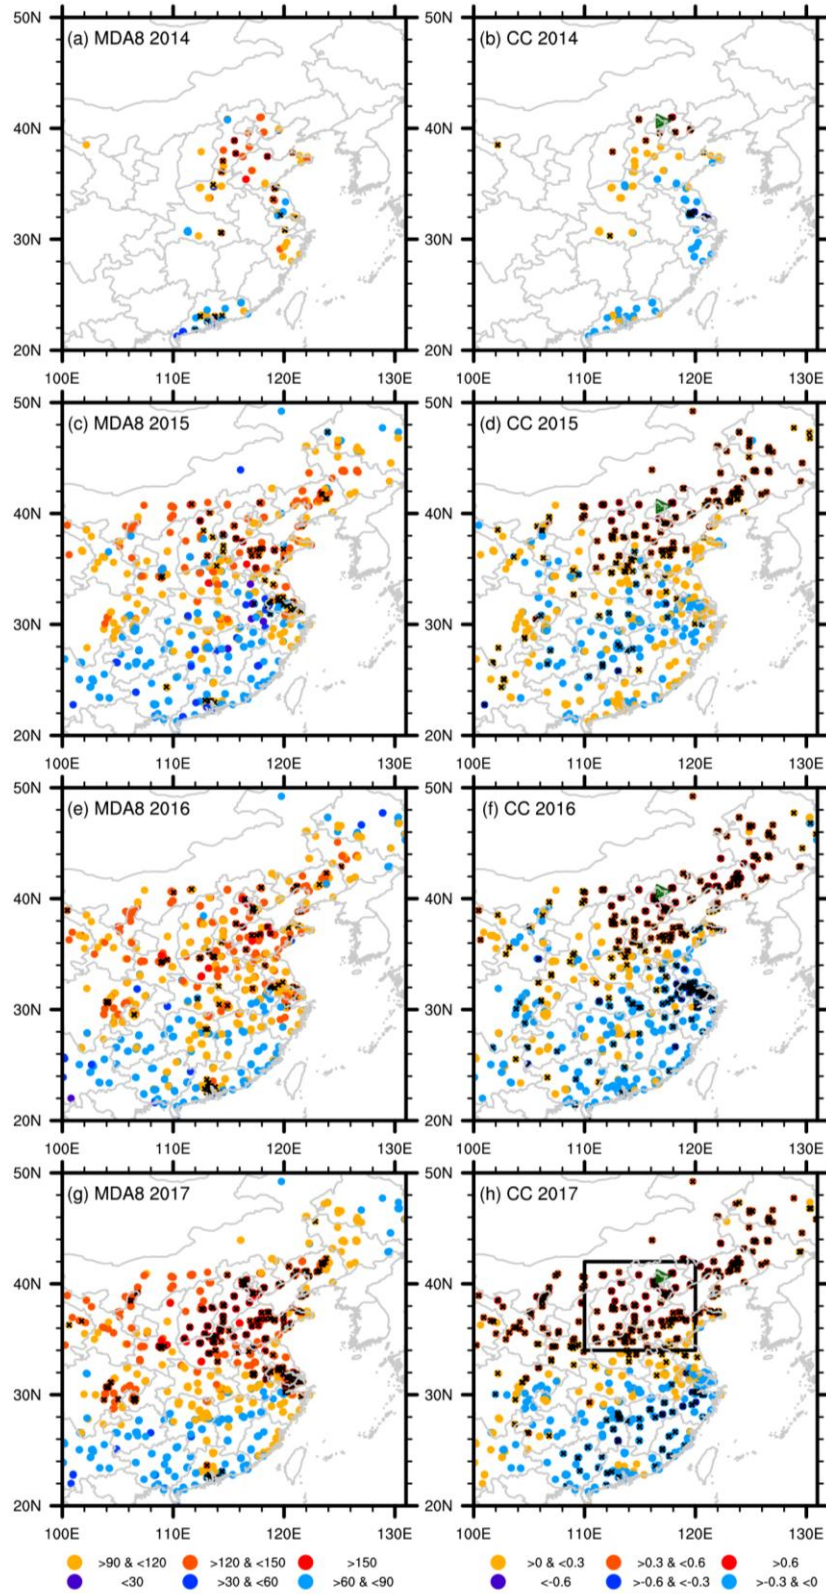

Figure 1. The distribution of the JJA mean MDA8 (a, c, e, g) and the correlation coefficients (b, d, f, h) between the daily MDA8 and SDZ MDA8 from 2014 to 2017. The black cross in panels a, c, e, and g indicate that the maximum daily MDA8 was larger than  $265 \mu\text{g}/\text{m}^3$ . The black cross in panels b, d, f, and

h indicate that the CC was above the 95% confidence level. The green triangle in panels b, d, f, and h illustrate the location of the SDZ station. The black box in panel h is the range of North China.

**Line 92: There are a few instances where the degree symbol is not superscript in the manuscript.**

**Reply:**

The similar errors were corrected throughout the manuscript.

**Line 94: How can there be a diurnal difference in a maximum daily average? This sentence makes no sense to me.**

**Reply:**

The errors were corrected. It should be **daily difference**.

**Revision:**

The daily difference in MDA8 was large, which contradicts the quasi-constant emission of ozone precursors.

**Line 97: Can you switch the order, introducing NOP before MOP.**

**Reply:**

According to the reviewer's advice, the orders were switched.

**Revision:**

...the thresholds of non-surface O<sub>3</sub> polluted level (NOP) and moderate surface O<sub>3</sub> polluted level (MOP) are 100 µg/m<sup>3</sup> and 215 µg/m<sup>3</sup>, respectively...

**Line 99: The mean number of MOP days is not explicitly shown in FigureS3.**

**Reply:**

Replied in comment 5.6, the Figure was changed to Table S1 and the mean number of the MOP and NOP days were also listed.

**Revision:**

Table S1. The number of days with MOP and NOP events.

|     | 2007 | 2008 | 2009 | 2010 | 2011 | 2012 | 2013 | 2014 | 2015 | 2016 | 2017 | Mean |
|-----|------|------|------|------|------|------|------|------|------|------|------|------|
| MOP | 22   | 8    | 8    | 24   | 14   | 9    | 10   | 11   | 26   | 11   | 12   | 14   |
| NOP | 4    | 12   | 12   | 8    | 4    | 17   | 22   | 9    | 4    | 18   | 16   | 11.5 |

**Line 100: significant at what level? If this is from a figure in the supplement, consider moving that figure out of the supplement.**

**Reply:**

The interannual variation in MOP (NOP) days was significant at the 95% confidence level, which was verified by t-test.

**Revision:**

...The interannual variation in MOP (NOP) days was significant at the 95% confidence level, without an obvious long-term trend...

**Line 103: use SAT instead of spelling it out and introduce why cooler temperature in the high troposphere (T200) is favorable for surface ozone pollution (mentioned later in Line 117).**

**Reply:**

(1) the abbreviation, i.e., SAT, was used.

(2) According to the other reviewer's suggestion (attached below), the discussion about the reason, why cooler temperature in the high troposphere (T200) is favorable for surface ozone pollution, was deleted.

Line 116-117: The temperature of the upper troposphere is much more dynamically than radiatively-influenced at synoptic timescales (i.e. through tropopause height variations). This sentence should be removed. ↩

Because we cannot perfectly address it now, the question was leave as an open question in the "Conclusion and Discussion" section.

**Revision:**

...The processes how the weather conditions impacted the photochemical reaction were not deeply discussed here and have been analyzed in many previous studies by the atmospheric chemists. **However, the reason why the cooler high troposphere contributed to the surface ozone pollution was still an open question and needed further attention...**

**Line 121: what is downwash**

**Reply:**

The downwash was confusing and was changed to "entrainment..... into the boundary layer".

**Revision:**

...The **entrainment of atmospheric ozone from the upper air into the boundary layer** enlarged the surface O<sub>3</sub> concentration (An et al., 2009)...

**Line 126: Why is Figure S5 included in the supplement**

**Reply:**

All of the results from the NCEP/NCAR datasets were included in the supplementary information. The identical results were Figure 2 c, d by the ERA-Interim data.

**Line 130: Any time MDA8 is used, is the reader expecting it to be the SDZ MDA8 unless otherwise stated? Make that clear earlier on in the text.**

**Reply:**

The negligence were corrected throughout the manuscript. The MDA8 in SDZ station was denoted as **SDZ MDA8**, comparing to the **MDA8 in the other sites**.

**Revision:**

-----  
2017). The correlation coefficients between SDZ MDA8 and the observed MDA8 at the other sites were calculated and are shown in Figure 1 (b, d, f, h). The distribution of correlation coefficients is similar to the MDA8 on Figure 1 (a, c, e, g). The SDZ MDA8 significantly covaried with the MDA8 in North China in summer. Along with the increasing of the surface O<sub>3</sub> pollution, the covariation and the representativeness of SDZ MDA8 to the MDA8 in North China was strengthened. However,  
-----

**Line 137: Reference Figure S7b-d. ‘in North China (Figure S7b-d)’**

**Reply:**

The related Figure, i.e., Figure 5, was referred now.

**Revision:**

...The significantly positive correlations were distributed in North China (Figure 5 b-d)...

**Line 143-144: remind the reader that SDZ data began in 2006. This sentence is not clear to me.**

**Reply:**

The confusing expression was corrected as follows:

**Revision:**

...During 2007–2017, the constructed JJA (June-July-August) mean OWI varied similarly with the observed MDA8 and captured the extremes (Figure 6). **Although the range of the SDZ MDA8 was 2006–2017, in the above OWI construction processes, only the data from 2007 to 2017 were used.** Thus, the datasets in 2006 were independent samples, and could verify the performance of the OWI...



**Line 145: What do you mean by a staged minimum?**

***Reply:***

The presentation was not clear. Actually, the value in 2006 was the minimum.

This sentence was modified.

***Revision:***

...The JJA mean OWI in 2006 successfully reflected the variation in observed MDA8; even the MDA8 in 2006 was the minimum...

**Line 148: Significant to what test and level?**

***Reply:***

This sentence was modified.

***Revision:***

...Before the mid-1990s, the OWI was below zero, with a slightly decreasing trend and insignificant interannual variation. Since then, the OWI has increased...

**Line 150: provide a reference for the sentence ending ‘....due to the steady economic development in China’**

***Reply:***

A related reference was provided.

***Revision:***

...The emissions of O3 precursors increased persistently and linearly due to the steady economic development in China (Wang 2017)...
